# Supplementary material for: Evidence of widespread, independent sequence signature for transcription factor cobinding
Source: HighWire-hosted journal article supplement (doi:10.1101/gr.267310.120), 2020-12-10
Supplement: Supplemental_Tables.xlsx [file Supplemental_Tables.xlsx]

## Sheet: Table S1. dataset & TF family
Supplementary table S1. Availability of ChIP-seq data for 13 single transcription factor binding sites on 10 cell types and TF families.
TF	A549	GM12878	H1-hESC	HCT116	HeLa-S3	HepG2	K562	MCF-7	iPSC	liver				TF	Family
ATF3												Data from DREAM-ENCODE		ATF3	bZIP
CTCF												Data from ENCODE (outside DREAM)		CTCF	C2H2 ZF(non-KRAB)
E2F1														E2F1	E2F
EGR1														EGR1	C2H2 ZF(non-KRAB)
FOXA1														FOXA1	Forkhead
FOXA2														FOXA2	Forkhead
GABPA														GABPA	Ets
HNF4A														HNF4A	Nuclear receptor
JUND														JUND	bZIP
MAX														MAX	bHLH
NANOG														NANOG	Homeodomain
REST														REST	C2H2 ZF(non-KRAB)
TAF1														TAF1	TAF1

## Sheet: Table S2. tf_co_cell
Supplementary table S2. TF-TF co-occupancy files and the split of training and testing datasets.
	A549	GM12878	H1-hESC	HCT116	HeLa-S3	HepG2	K562	MCF-7	iPSC	liver	number of datasets
ATF3_CTCF	1	0	1	1	0	1	1	0	0	0	5	train
ATF3_EGR1	0	0	1	1	0	0	1	0	0	0	3	test
ATF3_GABPA	0	0	1	0	0	1	1	0	0	0	3
ATF3_JUND	1	0	1	1	0	1	1	0	0	0	5
ATF3_MAX	1	0	1	1	0	1	1	0	0	0	5
ATF3_REST	1	0	1	0	0	1	1	0	0	0	4
ATF3_TAF1	1	0	1	0	0	1	1	0	0	0	4
CTCF_E2F1	0	1	0	0	1	0	1	0	0	0	3
CTCF_EGR1	0	1	1	1	0	0	1	1	0	0	5
CTCF_FOXA1	0	0	0	0	0	1	0	1	0	0	2
CTCF_GABPA	0	1	1	0	1	1	1	1	0	0	6
CTCF_JUND	1	1	1	1	1	1	1	1	0	0	8
CTCF_MAX	1	1	1	1	1	1	1	0	0	0	7
CTCF_NANOG	0	0	1	0	0	0	0	0	1	0	2
CTCF_REST	1	1	1	0	1	1	1	1	0	0	7
CTCF_TAF1	1	1	1	0	1	1	1	0	0	0	6
E2F1_EGR1	0	1	0	0	0	0	1	0	0	0	2
E2F1_GABPA	0	1	0	0	1	0	1	0	0	0	3
E2F1_JUND	0	1	0	0	1	0	1	0	0	0	3
E2F1_MAX	0	1	0	0	1	0	1	0	0	0	3
E2F1_REST	0	1	0	0	1	0	1	0	0	0	3
E2F1_TAF1	0	1	0	0	1	0	1	0	0	0	3
EGR1_FOXA1	0	0	0	0	0	0	0	1	0	1	2
EGR1_GABPA	0	1	1	0	0	0	1	1	0	1	5
EGR1_JUND	0	1	1	1	0	0	1	1	0	1	6
EGR1_MAX	0	1	1	1	0	0	1	0	0	1	5
EGR1_REST	0	1	1	0	0	0	1	1	0	1	5
EGR1_TAF1	0	1	1	0	0	0	1	0	0	1	4
FOXA1_FOXA2	0	0	0	0	0	1	0	0	0	1	2
FOXA1_GABPA	0	0	0	0	0	1	0	1	0	1	3
FOXA1_HNF4A	0	0	0	0	0	1	0	0	0	1	2
FOXA1_JUND	0	0	0	0	0	1	0	1	0	1	3
FOXA1_MAX	0	0	0	0	0	1	0	0	0	1	2
FOXA1_REST	0	0	0	0	0	1	0	1	0	1	3
FOXA1_TAF1	0	0	0	0	0	1	0	0	0	1	2
FOXA2_GABPA	0	0	0	0	0	1	0	0	0	1	2
FOXA2_HNF4A	0	0	0	0	0	1	0	0	0	1	2
FOXA2_JUND	0	0	0	0	0	1	0	0	0	1	2
FOXA2_MAX	0	0	0	0	0	1	0	0	0	1	2
FOXA2_REST	0	0	0	0	0	1	0	0	0	1	2
FOXA2_TAF1	0	0	0	0	0	1	0	0	0	1	2
GABPA_HNF4A	0	0	0	0	0	1	0	0	0	1	2
GABPA_JUND	0	1	1	0	1	1	1	1	0	1	7
GABPA_MAX	0	1	1	0	1	1	1	0	0	1	6
GABPA_REST	0	1	1	0	1	1	1	1	0	1	7
GABPA_TAF1	0	1	1	0	1	1	1	0	0	1	6
HNF4A_JUND	0	0	0	0	0	1	0	0	0	1	2
HNF4A_MAX	0	0	0	0	0	1	0	0	0	1	2
HNF4A_REST	0	0	0	0	0	1	0	0	0	1	2
HNF4A_TAF1	0	0	0	0	0	1	0	0	0	1	2
JUND_MAX	1	1	1	1	1	1	1	0	0	1	8
JUND_REST	1	1	1	0	1	1	1	1	0	1	8
JUND_TAF1	1	1	1	0	1	1	1	0	0	1	7
MAX_REST	1	1	1	0	1	1	1	0	0	1	7
MAX_TAF1	1	1	1	0	1	1	1	0	0	1	7
REST_TAF1	1	1	1	0	1	1	1	0	0	1	7
	A549	GM12878	H1-hESC	HCT116	HeLa-S3	HepG2	K562	MCF-7	iPSC	liver	total
number of avaliable co-occupancy data	15	28	29	10	21	40	35	15	1	34	228
number of test sets	6	8	6	5	5	8	5	5	1	7	56
number of training sets	9	20	23	5	16	32	30	10	0	27	172=228-56

## Sheet: Table S3. cross-cell line AUC
Supplementary table S3. The cross-cell line prediction AUROCs and AUPRCs values of 56 test TF-TF pairs
	Cell Line	AUROC	AUPRC
ATF3_CTCF	HCT116	0.998163	0.0864225
ATF3_EGR1	HCT116	0.998025	0.251298
ATF3_GABPA	H1-hESC	0.998469	0.0540786
ATF3_JUND	HCT116	0.997947	0.443568
ATF3_MAX	HCT116	0.997854	0.338845
ATF3_REST	A549	0.996476	0.0545213
ATF3_TAF1	A549	0.998308	0.208126
CTCF_E2F1	GM12878	0.998499	0.104015
CTCF_EGR1	GM12878	0.997592	0.126611
CTCF_FOXA1	MCF-7	0.996724	0.0697195
CTCF_GABPA	GM12878	0.999218	0.0846526
CTCF_JUND	K562	0.998757	0.432968
CTCF_MAX	A549	0.998055	0.359471
CTCF_NANOG	iPSC	0.995576	0.0105951
CTCF_REST	A549	0.996573	0.0244725
CTCF_TAF1	A549	0.998634	0.102484
E2F1_EGR1	GM12878	0.998706	0.229018
E2F1_GABPA	GM12878	0.999494	0.3381
E2F1_JUND	HeLa-S3	0.998718	0.0758926
E2F1_MAX	HeLa-S3	0.998102	0.254217
E2F1_REST	HeLa-S3	0.998649	0.0342936
E2F1_TAF1	HeLa-S3	0.998432	0.201808
EGR1_FOXA1	MCF-7	0.995509	0.03245
EGR1_GABPA	K562	0.998871	0.324826
EGR1_JUND	GM12878	0.998403	0.0633087
EGR1_MAX	HCT116	0.998205	0.547682
EGR1_REST	GM12878	0.995151	0.00841248
EGR1_TAF1	K562	0.998794	0.357157
FOXA1_FOXA2	liver	0.985847	0.295701
FOXA1_GABPA	MCF-7	0.995429	0.0411335
FOXA1_HNF4A	liver	0.986975	0.304849
FOXA1_JUND	MCF-7	0.99788	0.292127
FOXA1_MAX	liver	0.993865	0.261544
FOXA1_REST	MCF-7	0.997766	0.0993317
FOXA1_TAF1	liver	0.994081	0.0792113
FOXA2_GABPA	liver	0.994642	0.114684
FOXA2_HNF4A	liver	0.987749	0.404543
FOXA2_JUND	HepG2	0.993842	0.190949
FOXA2_MAX	HepG2	0.997682	0.401193
FOXA2_REST	HepG2	0.9975	0.153329
FOXA2_TAF1	HepG2	0.99723	0.0516492
GABPA_HNF4A	HepG2	0.995774	0.0171414
GABPA_JUND	H1-hESC	0.998836	0.094497
GABPA_MAX	GM12878	0.999418	0.322586
GABPA_REST	H1-hESC	0.997097	0.0310272
GABPA_TAF1	H1-hESC	0.998735	0.306958
HNF4A_JUND	HepG2	0.997799	0.10267
HNF4A_MAX	HepG2	0.995812	0.173064
HNF4A_REST	liver	0.991106	0.525153
HNF4A_TAF1	HepG2	0.996914	0.0427306
JUND_MAX	K562	0.99856	0.548628
JUND_REST	K562	0.998369	0.106794
JUND_TAF1	HeLa-S3	0.998656	0.217754
MAX_REST	A549	0.996612	0.116627
MAX_TAF1	H1-hESC	0.998117	0.404334
REST_TAF1	H1-hESC	0.997509	0.0619172

## Sheet: Table S4. cross-chromosome AUC
Supplementary table S4. The cross-chromosome prediction AUROCs and AUPRCs values of 56 test TF-TF pairs
	Cell Line	AUROC	AUPRC	AUPRC baseline	AUPRC/baseline
ATF3_CTCF	HCT116	0.998029	0.103987	0.000149614	695
ATF3_EGR1	HCT116	0.997958	0.289732	0.000964527	300
ATF3_GABPA	H1-hESC	0.998268	0.0436415	7.07e-05	617
ATF3_JUND	HCT116	0.997838	0.469331	0.00123209	380
ATF3_MAX	HCT116	0.997696	0.373339	0.00142195	262
ATF3_REST	A549	0.997217	0.0345063	9.33e-05	369
ATF3_TAF1	A549	0.998105	0.188977	0.000323425	584
CTCF_E2F1	GM12878	0.998652	0.10992	0.000140154	784
CTCF_EGR1	GM12878	0.997945	0.129445	0.000137219	943
CTCF_FOXA1	MCF-7	0.997248	0.100991	0.000190148	531
CTCF_GABPA	GM12878	0.999174	0.0806008	4.58e-05	1759
CTCF_JUND	K562	0.998696	0.514911	0.000864388	595
CTCF_MAX	A549	0.998079	0.331643	0.00054245	611
CTCF_NANOG	iPSC	0.993632	0.0137033	4.83e-05	283
CTCF_REST	A549	0.997326	0.0218156	5.49e-05	397
CTCF_TAF1	A549	0.99859	0.0903957	0.000115639	781
E2F1_EGR1	GM12878	0.998628	0.209292	0.000351596	595
E2F1_GABPA	GM12878	0.999496	0.340251	0.000225717	1507
E2F1_JUND	HeLa-S3	0.998585	0.0714368	0.000117893	605
E2F1_MAX	HeLa-S3	0.997906	0.272639	0.000623066	437
E2F1_REST	HeLa-S3	0.998053	0.0366764	4.99e-05	734
E2F1_TAF1	HeLa-S3	0.998319	0.209909	0.00043502	482
EGR1_FOXA1	MCF-7	0.99601	0.0465045	0.000125734	369
EGR1_GABPA	K562	0.998422	0.340437	0.000491111	693
EGR1_JUND	GM12878	0.998452	0.0639269	0.000123729	516
EGR1_MAX	HCT116	0.997762	0.537396	0.00219364	244
EGR1_REST	GM12878	0.995213	0.00828561	2.29e-05	361
EGR1_TAF1	K562	0.998589	0.381376	0.000855504	445
FOXA1_FOXA2	liver	0.984926	0.285304	0.00164085	173
FOXA1_GABPA	MCF-7	0.995202	0.0447921	0.000260763	171
FOXA1_HNF4A	liver	0.986473	0.316696	0.00150314	210
FOXA1_JUND	MCF-7	0.997927	0.291876	0.000501359	582
FOXA1_MAX	liver	0.992803	0.250919	0.0011049	227
FOXA1_REST	MCF-7	0.998364	0.148112	0.000145731	1016
FOXA1_TAF1	liver	0.995019	0.0749483	0.000378467	198
FOXA2_GABPA	liver	0.992666	0.103472	0.000665869	155
FOXA2_HNF4A	liver	0.988768	0.403921	0.00191076	211
FOXA2_JUND	HepG2	0.994286	0.197191	0.000614549	320
FOXA2_MAX	HepG2	0.997689	0.445428	0.00118225	376
FOXA2_REST	HepG2	0.998198	0.200983	0.000353436	568
FOXA2_TAF1	HepG2	0.997997	0.0657914	0.000164828	399
GABPA_HNF4A	HepG2	0.996836	0.0195424	9.14e-05	213
GABPA_JUND	H1-hESC	0.998803	0.0991612	0.000105773	937
GABPA_MAX	GM12878	0.999332	0.323765	0.000215976	1499
GABPA_REST	H1-hESC	0.996031	0.0234973	8.89e-05	264
GABPA_TAF1	H1-hESC	0.998566	0.284044	0.000379441	748
HNF4A_JUND	HepG2	0.998018	0.133258	0.000290043	459
HNF4A_MAX	HepG2	0.997599	0.334659	0.000817481	409
HNF4A_REST	liver	0.989646	0.481857	0.00243769	197
HNF4A_TAF1	HepG2	0.997472	0.0472677	0.000152618	309
JUND_MAX	K562	0.998207	0.571123	0.00185621	307
JUND_REST	K562	0.998161	0.136953	0.000392873	348
JUND_TAF1	HeLa-S3	0.998298	0.215828	0.000400519	538
MAX_REST	A549	0.996774	0.100208	0.000261846	382
MAX_TAF1	H1-hESC	0.997858	0.402513	0.00122672	328
REST_TAF1	H1-hESC	0.997006	0.0530803	0.000190701	278

## Sheet: Table S5. BU and UU in samples
Supplementary table S5. The number of single-bound (BU) and no-bound (UU) in samples.
	TF2	Cell	BU	UU	BU+UU	BU/(BU+UU)
ATF3	CTCF	H1-hESC	1075	63515	64590	0.0166434		BU: single-bound
ATF3	CTCF	HCT116	1233	63374	64607	0.0190846		UU: no-bound
ATF3	CTCF	HepG2	972	63665	64637	0.0150378
ATF3	CTCF	K562	2746	61765	64511	0.0425664
ATF3	CTCF	A549	1469	63110	64579	0.0227473
ATF3	EGR1	H1-hESC	446	38057	38503	0.0115835
ATF3	EGR1	HCT116	891	37507	38398	0.0232043
ATF3	EGR1	K562	1521	36891	38412	0.039597
ATF3	GABPA	H1-hESC	818	37783	38601	0.0211912
ATF3	GABPA	HepG2	795	37816	38611	0.02059
ATF3	GABPA	K562	1397	37187	38584	0.0362067
ATF3	JUND	H1-hESC	640	63806	64446	0.00993079
ATF3	JUND	HCT116	1476	62744	64220	0.0229835
ATF3	JUND	HepG2	1356	63105	64461	0.021036
ATF3	JUND	K562	2084	61920	64004	0.0325605
ATF3	JUND	A549	1163	63193	64356	0.0180714
ATF3	MAX	H1-hESC	1519	62827	64346	0.0236068
ATF3	MAX	HCT116	1692	62459	64151	0.0263753
ATF3	MAX	HepG2	1990	62373	64363	0.0309184
ATF3	MAX	K562	3005	61034	64039	0.0469245
ATF3	MAX	A549	1803	62408	64211	0.0280793
ATF3	REST	H1-hESC	739	50828	51567	0.0143309
ATF3	REST	HepG2	780	50782	51562	0.0151274
ATF3	REST	K562	1897	49591	51488	0.0368435
ATF3	REST	A549	1214	50331	51545	0.0235522
ATF3	TAF1	H1-hESC	1057	50456	51513	0.0205191
ATF3	TAF1	HepG2	957	50592	51549	0.0185649
ATF3	TAF1	K562	1931	49506	51437	0.0375411
ATF3	TAF1	A549	943	50545	51488	0.0183149
CTCF	E2F1	HeLa-S3	702	37920	38622	0.0181762
CTCF	E2F1	K562	961	37629	38590	0.0249028
CTCF	E2F1	GM12878	910	37687	38597	0.023577
CTCF	EGR1	H1-hESC	1224	63347	64571	0.0189559
CTCF	EGR1	K562	1496	63069	64565	0.0231704
CTCF	EGR1	MCF-7	1701	62872	64573	0.0263423
CTCF	EGR1	HCT116	1537	63025	64562	0.0238066
CTCF	EGR1	GM12878	887	63717	64604	0.0137298
CTCF	FOXA1	HepG2	750	24829	25579	0.0293209
CTCF	FOXA1	MCF-7	809	24770	25579	0.0316275
CTCF	GABPA	H1-hESC	1953	75433	77386	0.0252371
CTCF	GABPA	HeLa-S3	1192	76386	77578	0.0153652
CTCF	GABPA	HepG2	1939	75605	77544	0.0250052
CTCF	GABPA	K562	1246	76310	77556	0.0160658
CTCF	GABPA	MCF-7	2500	74943	77443	0.0322818
CTCF	GABPA	GM12878	1220	76355	77575	0.0157267
CTCF	JUND	A549	1690	101588	103278	0.0163636
CTCF	JUND	H1-hESC	1816	101454	103270	0.017585
CTCF	JUND	HeLa-S3	2256	100937	103193	0.0218619
CTCF	JUND	HepG2	2713	100607	103320	0.0262582
CTCF	JUND	K562	2444	100617	103061	0.0237141
CTCF	JUND	MCF-7	3038	100135	103173	0.0294457
CTCF	JUND	HCT116	2552	100660	103212	0.0247258
CTCF	JUND	GM12878	1301	102019	103320	0.0125919
CTCF	MAX	A549	2573	87650	90223	0.0285182
CTCF	MAX	H1-hESC	2547	87563	90110	0.0282655
CTCF	MAX	HeLa-S3	1888	88351	90239	0.0209222
CTCF	MAX	HepG2	3057	87137	90194	0.0338936
CTCF	MAX	K562	2852	87260	90112	0.0316495
CTCF	MAX	HCT116	2486	87718	90204	0.0275598
CTCF	MAX	GM12878	1614	88678	90292	0.0178753
CTCF	NANOG	H1-hESC	489	25086	25575	0.0191202
CTCF	NANOG	iPSC	648	24935	25583	0.0253293
CTCF	REST	A549	1788	88752	90540	0.0197482
CTCF	REST	H1-hESC	1967	88508	90475	0.0217408
CTCF	REST	HeLa-S3	1489	89016	90505	0.0164521
CTCF	REST	HepG2	1849	88667	90516	0.0204273
CTCF	REST	K562	1493	88984	90477	0.0165014
CTCF	REST	MCF-7	2570	87803	90373	0.0284377
CTCF	REST	GM12878	1146	89396	90542	0.0126571
CTCF	TAF1	A549	1317	76321	77638	0.0169633
CTCF	TAF1	H1-hESC	2058	75493	77551	0.0265374
CTCF	TAF1	HeLa-S3	1371	76254	77625	0.0176618
CTCF	TAF1	HepG2	1723	75918	77641	0.0221919
CTCF	TAF1	K562	1444	76136	77580	0.018613
CTCF	TAF1	GM12878	1275	76362	77637	0.0164226
E2F1	EGR1	GM12878	572	24951	25523	0.0224112
E2F1	EGR1	K562	614	24904	25518	0.0240614
E2F1	GABPA	GM12878	952	37652	38604	0.0246607
E2F1	GABPA	HeLa-S3	586	38028	38614	0.0151758
E2F1	GABPA	K562	702	37909	38611	0.0181813
E2F1	JUND	GM12878	750	37827	38577	0.0194416
E2F1	JUND	HeLa-S3	945	37641	38586	0.0244907
E2F1	JUND	K562	999	37532	38531	0.0259272
E2F1	MAX	GM12878	927	37554	38481	0.0240898
E2F1	MAX	HeLa-S3	889	37643	38532	0.0230717
E2F1	MAX	K562	1344	37149	38493	0.0349154
E2F1	REST	GM12878	845	37791	38636	0.0218708
E2F1	REST	HeLa-S3	648	37998	38646	0.0167676
E2F1	REST	K562	632	37994	38626	0.016362
E2F1	TAF1	GM12878	821	37726	38547	0.0212987
E2F1	TAF1	HeLa-S3	659	37918	38577	0.0170827
E2F1	TAF1	K562	703	37839	38542	0.0182398
EGR1	FOXA1	MCF-7	659	24899	25558	0.0257845
EGR1	FOXA1	liver	588	24963	25551	0.0230128
EGR1	GABPA	GM12878	850	63675	64525	0.0131732
EGR1	GABPA	H1-hESC	1344	63116	64460	0.0208501
EGR1	GABPA	MCF-7	1625	62785	64410	0.025229
EGR1	GABPA	K562	994	63500	64494	0.0154123
EGR1	GABPA	liver	1532	62880	64412	0.0237844
EGR1	JUND	GM12878	895	76546	77441	0.0115572
EGR1	JUND	H1-hESC	874	76535	77409	0.0112907
EGR1	JUND	HCT116	1992	75048	77040	0.0258567
EGR1	JUND	MCF-7	1594	75707	77301	0.0206207
EGR1	JUND	K562	1827	75420	77247	0.0236514
EGR1	JUND	liver	1601	75595	77196	0.0207394
EGR1	MAX	GM12878	997	63325	64322	0.0155001
EGR1	MAX	H1-hESC	1514	62761	64275	0.023555
EGR1	MAX	HCT116	1746	62215	63961	0.0272979
EGR1	MAX	K562	2023	62143	64166	0.0315276
EGR1	MAX	liver	1412	62726	64138	0.022015
EGR1	REST	GM12878	710	63868	64578	0.0109945
EGR1	REST	H1-hESC	1012	63523	64535	0.0156814
EGR1	REST	MCF-7	1302	63161	64463	0.0201976
EGR1	REST	K562	1040	63473	64513	0.0161208
EGR1	REST	liver	1602	62759	64361	0.0248908
EGR1	TAF1	GM12878	669	50801	51470	0.0129979
EGR1	TAF1	H1-hESC	1064	50391	51455	0.0206783
EGR1	TAF1	K562	843	50599	51442	0.0163874
EGR1	TAF1	liver	1208	50253	51461	0.0234741
FOXA1	FOXA2	HepG2	764	24539	25303	0.030194
FOXA1	FOXA2	liver	468	24917	25385	0.0184361
FOXA1	GABPA	HepG2	1335	37228	38563	0.0346187
FOXA1	GABPA	MCF-7	1154	37394	38548	0.0299367
FOXA1	GABPA	liver	1110	37428	38538	0.0288027
FOXA1	HNF4A	HepG2	560	24893	25453	0.0220013
FOXA1	HNF4A	liver	790	24659	25449	0.0310425
FOXA1	JUND	HepG2	1243	37275	38518	0.0322706
FOXA1	JUND	MCF-7	1019	37502	38521	0.0264531
FOXA1	JUND	liver	981	37493	38474	0.0254977
FOXA1	MAX	HepG2	957	24468	25425	0.0376401
FOXA1	MAX	liver	636	24812	25448	0.0249921
FOXA1	REST	HepG2	942	37580	38522	0.0244536
FOXA1	REST	MCF-7	1047	37502	38549	0.0271602
FOXA1	REST	liver	1182	37323	38505	0.0306973
FOXA1	TAF1	HepG2	852	24720	25572	0.0333177
FOXA1	TAF1	liver	743	24828	25571	0.0290564
FOXA2	GABPA	HepG2	1109	24435	25544	0.0434153
FOXA2	GABPA	liver	646	24880	25526	0.0253075
FOXA2	HNF4A	HepG2	747	24708	25455	0.0293459
FOXA2	HNF4A	liver	634	24809	25443	0.0249184
FOXA2	JUND	HepG2	994	24496	25490	0.0389957
FOXA2	JUND	liver	577	24901	25478	0.022647
FOXA2	MAX	HepG2	1251	24155	25406	0.0492403
FOXA2	MAX	liver	609	24822	25431	0.0239472
FOXA2	REST	HepG2	894	24617	25511	0.0350437
FOXA2	REST	liver	664	24835	25499	0.0260402
FOXA2	TAF1	HepG2	1042	24530	25572	0.0407477
FOXA2	TAF1	liver	635	24927	25562	0.0248416
GABPA	HNF4A	HepG2	556	24969	25525	0.0217826
GABPA	HNF4A	liver	783	24689	25472	0.0307396
GABPA	JUND	GM12878	1149	89234	90383	0.0127126
GABPA	JUND	H1-hESC	1834	88422	90256	0.02032
GABPA	JUND	HeLa-S3	2039	88270	90309	0.022578
GABPA	JUND	HepG2	2981	87401	90382	0.0329822
GABPA	JUND	MCF-7	2312	87760	90072	0.0256684
GABPA	JUND	K562	1622	88638	90260	0.0179703
GABPA	JUND	liver	2456	87647	90103	0.0272577
GABPA	MAX	GM12878	1437	75955	77392	0.0185678
GABPA	MAX	H1-hESC	1984	75070	77054	0.0257482
GABPA	MAX	HeLa-S3	1514	75819	77333	0.0195777
GABPA	MAX	HepG2	2675	74430	77105	0.034693
GABPA	MAX	K562	1985	75304	77289	0.0256828
GABPA	MAX	liver	2065	75022	77087	0.0267879
GABPA	REST	GM12878	1126	89250	90376	0.0124591
GABPA	REST	H1-hESC	2080	88162	90242	0.0230491
GABPA	REST	HeLa-S3	1229	89126	90355	0.0136019
GABPA	REST	HepG2	2096	88209	90305	0.0232102
GABPA	REST	MCF-7	2290	87822	90112	0.0254128
GABPA	REST	K562	814	89505	90319	0.0090125
GABPA	REST	liver	2480	87495	89975	0.0275632
GABPA	TAF1	GM12878	1273	76232	77505	0.0164247
GABPA	TAF1	H1-hESC	1947	75316	77263	0.0251996
GABPA	TAF1	HeLa-S3	1091	76397	77488	0.0140796
GABPA	TAF1	HepG2	1833	75550	77383	0.0236874
GABPA	TAF1	K562	742	76705	77447	0.00958075
GABPA	TAF1	liver	2351	75029	77380	0.0303825
HNF4A	JUND	HepG2	588	24908	25496	0.0230624
HNF4A	JUND	liver	686	24696	25382	0.027027
HNF4A	MAX	HepG2	739	24681	25420	0.0290716
HNF4A	MAX	liver	690	24678	25368	0.0271996
HNF4A	REST	HepG2	383	25101	25484	0.015029
HNF4A	REST	liver	827	24578	25405	0.0325526
HNF4A	TAF1	HepG2	539	25018	25557	0.0210901
HNF4A	TAF1	liver	899	24619	25518	0.03523
JUND	MAX	HCT116	2800	99399	102199	0.0273975
JUND	MAX	HeLa-S3	2232	100290	102522	0.0217709
JUND	MAX	HepG2	4149	98618	102767	0.0403729
JUND	MAX	K562	3025	99311	102336	0.0295595
JUND	MAX	A549	2470	100226	102696	0.0240516
JUND	MAX	GM12878	1525	101388	102913	0.0148183
JUND	MAX	H1-hESC	2273	100507	102780	0.0221152
JUND	MAX	liver	2394	99988	102382	0.023383
JUND	REST	HeLa-S3	2197	100996	103193	0.0212902
JUND	REST	HepG2	2666	100549	103215	0.0258296
JUND	REST	K562	1835	101230	103065	0.0178043
JUND	REST	MCF-7	2330	100685	103015	0.0226181
JUND	REST	A549	1770	101487	103257	0.0171417
JUND	REST	GM12878	968	102337	103305	0.00937031
JUND	REST	H1-hESC	1359	101867	103226	0.0131653
JUND	REST	liver	2670	100057	102727	0.0259912
JUND	TAF1	HeLa-S3	1808	88483	90291	0.0200241
JUND	TAF1	HepG2	2708	87725	90433	0.0299448
JUND	TAF1	K562	1754	88433	90187	0.0194485
JUND	TAF1	A549	1342	89026	90368	0.0148504
JUND	TAF1	GM12878	1131	89241	90372	0.0125149
JUND	TAF1	H1-hESC	1722	88558	90280	0.019074
JUND	TAF1	liver	2507	87722	90229	0.0277849
MAX	REST	A549	2664	87583	90247	0.029519
MAX	REST	GM12878	1390	88926	90316	0.0153904
MAX	REST	H1-hESC	2372	87805	90177	0.0263038
MAX	REST	HeLa-S3	1799	88442	90241	0.0199355
MAX	REST	HepG2	2931	87173	90104	0.0325291
MAX	REST	K562	2292	87844	90136	0.0254282
MAX	REST	liver	2481	87338	89819	0.0276222
MAX	TAF1	A549	2506	87637	90143	0.0278003
MAX	TAF1	GM12878	1587	88536	90123	0.0176093
MAX	TAF1	H1-hESC	2438	87429	89867	0.027129
MAX	TAF1	HeLa-S3	1662	88399	90061	0.0184542
MAX	TAF1	HepG2	3295	86759	90054	0.0365892
MAX	TAF1	K562	2405	87553	89958	0.0267347
MAX	TAF1	liver	2713	87325	90038	0.0301317
REST	TAF1	H1-hESC	2061	88268	90329	0.0228166
REST	TAF1	HeLa-S3	1351	89048	90399	0.0149449
REST	TAF1	HepG2	1934	88459	90393	0.0213955
REST	TAF1	A549	1505	88938	90443	0.0166403
REST	TAF1	GM12878	1219	89246	90465	0.0134748
REST	TAF1	K562	951	89406	90357	0.0105249
REST	TAF1	liver	2789	87412	90201	0.0309198

## Sheet: Table S6. Peak fraction
Supplementary table S6. Two types of peak fractions of 56 TF-TF pairs in 10 different cell types.
TF1	TF2	Effector	Cell	coB	triB	neighborB	triB/coB	neighborB/coB
ATF3	CTCF	GABPA	H1-hESC	7333	916	2641	0.124915	0.360153		coB: TF1-TF2 bound
ATF3	CTCF	GABPA	HepG2	2430	614	1156	0.252675	0.47572		triB: TF1-TF2-Effector bound
ATF3	CTCF	GABPA	K562	16368	1861	3950	0.113697	0.241325		neighborB: Effectot bound within 300 bp
ATF3	CTCF	JUND	H1-hESC	7333	1283	3953	0.174962	0.53907
ATF3	CTCF	JUND	HCT116	5801	801	3391	0.13808	0.584554
ATF3	CTCF	JUND	HepG2	2430	899	1398	0.369959	0.575309
ATF3	CTCF	JUND	K562	16368	3522	11428	0.215176	0.698192
ATF3	CTCF	JUND	A549	8180	3597	4954	0.439731	0.605623
ATF3	CTCF	MAX	H1-hESC	7333	3417	5689	0.465976	0.775808
ATF3	CTCF	MAX	HCT116	5801	2440	4953	0.420617	0.853818
ATF3	CTCF	MAX	HepG2	2430	1724	2167	0.709465	0.89177
ATF3	CTCF	MAX	K562	16368	5243	10737	0.32032	0.655975
ATF3	CTCF	MAX	A549	8180	4049	6608	0.494988	0.807824
ATF3	CTCF	TAF1	H1-hESC	7333	654	2381	0.0891859	0.324697
ATF3	CTCF	TAF1	HepG2	2430	918	1123	0.377778	0.46214
ATF3	CTCF	TAF1	K562	16368	2052	5655	0.125367	0.345491
ATF3	CTCF	TAF1	A549	8180	1999	3093	0.244377	0.378117
ATF3	EGR1	CTCF	H1-hESC	3925	1248	1592	0.317962	0.405605
ATF3	EGR1	CTCF	HCT116	38445	3685	6072	0.0958512	0.15794
ATF3	EGR1	CTCF	K562	41538	1335	4840	0.0321392	0.11652
ATF3	EGR1	GABPA	H1-hESC	3925	1391	1987	0.354395	0.506242
ATF3	EGR1	GABPA	K562	41538	2678	10053	0.0644711	0.242019
ATF3	EGR1	JUND	H1-hESC	3925	2140	2897	0.545223	0.738089
ATF3	EGR1	JUND	HCT116	38445	5078	29794	0.132085	0.774977
ATF3	EGR1	JUND	K562	41538	14147	26328	0.34058	0.633829
ATF3	EGR1	JUND	H1-hESC	3925	2140	2897	0.545223	0.738089
ATF3	EGR1	JUND	HCT116	38445	5078	29794	0.132085	0.774977
ATF3	EGR1	JUND	K562	41538	14147	26328	0.34058	0.633829
ATF3	EGR1	MAX	H1-hESC	3925	2905	3607	0.740127	0.918981
ATF3	EGR1	MAX	HCT116	38445	9845	32481	0.25608	0.844869
ATF3	EGR1	MAX	K562	41538	16352	26444	0.393664	0.636622
ATF3	GABPA	CTCF	H1-hESC	3877	1566	2079	0.403921	0.536239
ATF3	GABPA	CTCF	HepG2	4721	721	1119	0.152722	0.237026
ATF3	GABPA	CTCF	K562	17137	1351	2937	0.0788353	0.171384
ATF3	GABPA	JUND	H1-hESC	3877	2042	2385	0.526696	0.615166
ATF3	GABPA	JUND	HepG2	4721	1153	2983	0.244228	0.631858
ATF3	GABPA	JUND	K562	17137	2855	12003	0.166599	0.700414
ATF3	GABPA	MAX	H1-hESC	3877	2761	3546	0.712149	0.914625
ATF3	GABPA	MAX	HepG2	4721	3147	4480	0.666596	0.948951
ATF3	GABPA	MAX	K562	17137	8443	13987	0.492677	0.816187
ATF3	GABPA	TAF1	H1-hESC	3877	1525	2560	0.393345	0.660304
ATF3	GABPA	TAF1	HepG2	4721	3340	4064	0.707477	0.860835
ATF3	GABPA	TAF1	K562	17137	5685	11903	0.331738	0.694579
ATF3	JUND	CTCF	H1-hESC	4501	1058	1586	0.235059	0.352366
ATF3	JUND	CTCF	HCT116	51179	3918	6162	0.0765548	0.120401
ATF3	JUND	CTCF	HepG2	4268	565	833	0.132381	0.195173
ATF3	JUND	CTCF	K562	107199	5923	10780	0.0552524	0.100561
ATF3	JUND	CTCF	A549	22668	2881	3985	0.127095	0.175798
ATF3	JUND	GABPA	H1-hESC	4501	1271	2102	0.282382	0.467007
ATF3	JUND	GABPA	HepG2	4268	462	1176	0.108247	0.275539
ATF3	JUND	GABPA	K562	107199	7023	14291	0.0655137	0.133313
ATF3	JUND	MAX	H1-hESC	4501	2838	3724	0.630527	0.827372
ATF3	JUND	MAX	HCT116	51179	10261	43067	0.200492	0.841497
ATF3	JUND	MAX	HepG2	4268	2378	3549	0.55717	0.831537
ATF3	JUND	MAX	K562	107199	18092	52084	0.16877	0.485863
ATF3	JUND	MAX	A549	22668	7922	19819	0.349479	0.874316
ATF3	MAX	CTCF	H1-hESC	12393	3472	5044	0.280158	0.407004
ATF3	MAX	CTCF	HCT116	57952	5877	8673	0.101412	0.149658
ATF3	MAX	CTCF	HepG2	10645	1196	2206	0.112353	0.207233
ATF3	MAX	CTCF	K562	62200	4820	9219	0.077492	0.148215
ATF3	MAX	CTCF	A549	45211	5329	7228	0.11787	0.159873
ATF3	MAX	GABPA	H1-hESC	12393	2897	5658	0.233761	0.456548
ATF3	MAX	GABPA	HepG2	10645	1726	4897	0.162142	0.460028
ATF3	MAX	GABPA	K562	62200	8373	15962	0.134614	0.256624
ATF3	MAX	JUND	H1-hESC	12393	2915	6986	0.235213	0.563705
ATF3	MAX	JUND	HCT116	57952	6606	42652	0.113991	0.735988
ATF3	MAX	JUND	HepG2	10645	4605	6381	0.432597	0.599436
ATF3	MAX	JUND	K562	62200	10438	42479	0.167814	0.682942
ATF3	MAX	JUND	A549	45211	13040	24781	0.288425	0.548119
ATF3	MAX	TAF1	H1-hESC	12393	3327	7540	0.268458	0.608408
ATF3	MAX	TAF1	HepG2	10645	5190	6451	0.487553	0.606012
ATF3	MAX	TAF1	K562	62200	10246	26104	0.164727	0.419678
ATF3	MAX	TAF1	A549	45211	10458	17241	0.231315	0.381345
ATF3	REST	CTCF	H1-hESC	1571	484	690	0.308084	0.439211
ATF3	REST	CTCF	HepG2	3110	281	477	0.0903537	0.153376
ATF3	REST	CTCF	K562	10899	528	1451	0.0484448	0.133131
ATF3	REST	CTCF	A549	5966	911	1225	0.152699	0.20533
ATF3	REST	GABPA	H1-hESC	1571	375	797	0.238701	0.50732
ATF3	REST	GABPA	HepG2	3110	498	1429	0.160129	0.459486
ATF3	REST	GABPA	K562	10899	1168	3934	0.107166	0.360951
ATF3	REST	JUND	H1-hESC	1571	495	1044	0.315086	0.664545
ATF3	REST	JUND	HepG2	3110	708	2003	0.227653	0.644051
ATF3	REST	JUND	K562	10899	1604	8640	0.147169	0.792733
ATF3	REST	JUND	A549	5966	2246	3222	0.376467	0.54006
ATF3	REST	MAX	H1-hESC	1571	998	1345	0.635264	0.856143
ATF3	REST	MAX	HepG2	3110	1419	2895	0.45627	0.930868
ATF3	REST	MAX	K562	10899	2860	7822	0.262409	0.717681
ATF3	REST	MAX	A549	5966	3323	4885	0.55699	0.818807
ATF3	TAF1	CTCF	H1-hESC	9799	1771	2710	0.180733	0.276559
ATF3	TAF1	CTCF	HepG2	4808	543	872	0.112937	0.181364
ATF3	TAF1	CTCF	K562	29408	2028	4544	0.0689608	0.154516
ATF3	TAF1	CTCF	A549	17569	2352	3192	0.133872	0.181684
ATF3	TAF1	GABPA	H1-hESC	9799	3072	5140	0.313501	0.524543
ATF3	TAF1	GABPA	HepG2	4808	1089	3147	0.226498	0.654534
ATF3	TAF1	GABPA	K562	29408	7146	11920	0.242995	0.405332
ATF3	TAF1	JUND	H1-hESC	9799	2971	6328	0.303194	0.64578
ATF3	TAF1	JUND	HepG2	4808	1212	2502	0.25208	0.520383
ATF3	TAF1	JUND	K562	29408	4511	18066	0.153394	0.614323
ATF3	TAF1	JUND	A549	17569	5991	8919	0.340998	0.507656
ATF3	TAF1	MAX	H1-hESC	9799	6747	8736	0.68854	0.89152
ATF3	TAF1	MAX	HepG2	4808	3183	4575	0.662022	0.951539
ATF3	TAF1	MAX	K562	29408	13219	22879	0.449504	0.777986
ATF3	TAF1	MAX	A549	17569	9846	14843	0.560419	0.84484
CTCF	E2F1	GABPA	HeLa-S3	5658	859	1879	0.15182	0.332096
CTCF	E2F1	GABPA	K562	6826	1206	2392	0.176677	0.350425
CTCF	E2F1	GABPA	GM12878	7308	1824	2311	0.249589	0.316229
CTCF	E2F1	GABPA	HeLa-S3	5658	859	1879	0.15182	0.332096
CTCF	E2F1	GABPA	K562	6826	1206	2392	0.176677	0.350425
CTCF	E2F1	GABPA	GM12878	7308	1824	2311	0.249589	0.316229
CTCF	E2F1	JUND	HeLa-S3	5658	473	2435	0.0835984	0.430364
CTCF	E2F1	JUND	K562	6826	1164	3871	0.170524	0.567096
CTCF	E2F1	JUND	GM12878	7308	3098	3560	0.423919	0.487137
CTCF	E2F1	TAF1	HeLa-S3	5658	1577	3474	0.27872	0.613998
CTCF	E2F1	TAF1	K562	6826	2159	3991	0.316291	0.584676
CTCF	E2F1	TAF1	GM12878	7308	2973	4140	0.406814	0.566502
CTCF	EGR1	E2F1	K562	14357	3980	5034	0.277217	0.35063
CTCF	EGR1	E2F1	GM12878	7355	1006	2565	0.136778	0.348742
CTCF	EGR1	GABPA	H1-hESC	9220	1045	3936	0.113341	0.426898
CTCF	EGR1	GABPA	K562	14357	2239	4854	0.155952	0.338093
CTCF	EGR1	GABPA	MCF-7	8172	1547	3825	0.189305	0.468062
CTCF	EGR1	GABPA	GM12878	7355	1890	2578	0.256968	0.35051
CTCF	EGR1	GABPA	H1-hESC	9220	1045	3936	0.113341	0.426898
CTCF	EGR1	GABPA	K562	14357	2239	4854	0.155952	0.338093
CTCF	EGR1	GABPA	MCF-7	8172	1547	3825	0.189305	0.468062
CTCF	EGR1	GABPA	GM12878	7355	1890	2578	0.256968	0.35051
CTCF	EGR1	JUND	H1-hESC	9220	489	2995	0.0530369	0.324837
CTCF	EGR1	JUND	K562	14357	1672	7528	0.116459	0.524344
CTCF	EGR1	JUND	MCF-7	8172	2832	3883	0.346549	0.475159
CTCF	EGR1	JUND	HCT116	12019	861	6563	0.0716366	0.546052
CTCF	EGR1	JUND	GM12878	7355	2135	2682	0.290279	0.36465
CTCF	EGR1	JUND	H1-hESC	9220	489	2995	0.0530369	0.324837
CTCF	EGR1	JUND	K562	14357	1672	7528	0.116459	0.524344
CTCF	EGR1	JUND	MCF-7	8172	2832	3883	0.346549	0.475159
CTCF	EGR1	JUND	HCT116	12019	861	6563	0.0716366	0.546052
CTCF	EGR1	JUND	GM12878	7355	2135	2682	0.290279	0.36465
CTCF	EGR1	TAF1	H1-hESC	9220	1379	4155	0.149566	0.450651
CTCF	EGR1	TAF1	K562	14357	5142	7693	0.358153	0.535836
CTCF	EGR1	TAF1	GM12878	7355	2627	4331	0.357172	0.588851
CTCF	FOXA1	GABPA	HepG2	14317	972	1338	0.0678913	0.0934553
CTCF	FOXA1	GABPA	MCF-7	8216	251	1258	0.0305501	0.153116
CTCF	FOXA1	JUND	HepG2	14317	649	1808	0.0453307	0.126283
CTCF	FOXA1	JUND	MCF-7	8216	753	1747	0.0916504	0.212634
CTCF	GABPA	JUND	H1-hESC	14959	498	1905	0.033291	0.127348
CTCF	GABPA	JUND	HeLa-S3	3439	577	1488	0.167781	0.432684
CTCF	GABPA	JUND	HepG2	7119	821	1924	0.115325	0.270263
CTCF	GABPA	JUND	K562	8135	637	5173	0.0783036	0.635894
CTCF	GABPA	JUND	MCF-7	13013	4639	6356	0.35649	0.488435
CTCF	GABPA	JUND	GM12878	2458	312	1558	0.126932	0.633849
CTCF	GABPA	TAF1	H1-hESC	14959	1269	4563	0.0848319	0.305034
CTCF	GABPA	TAF1	HeLa-S3	3439	1774	2348	0.515848	0.682757
CTCF	GABPA	TAF1	HepG2	7119	2251	4524	0.316196	0.635483
CTCF	GABPA	TAF1	K562	8135	2772	5314	0.34075	0.653227
CTCF	GABPA	TAF1	GM12878	2458	1464	1938	0.595606	0.788446
CTCF	JUND	ATF3	A549	8463	2560	5154	0.302493	0.609004
CTCF	JUND	ATF3	H1-hESC	5177	825	2253	0.159359	0.435194
CTCF	JUND	ATF3	HepG2	5421	1339	1954	0.247002	0.36045
CTCF	JUND	ATF3	K562	31837	1661	12249	0.052172	0.384741
CTCF	JUND	ATF3	HCT116	9729	2514	4512	0.258403	0.463768
CTCF	JUND	GABPA	H1-hESC	5177	529	1921	0.102183	0.371064
CTCF	JUND	GABPA	HeLa-S3	18508	1410	2068	0.0761833	0.111735
CTCF	JUND	GABPA	HepG2	5421	297	923	0.0547869	0.170264
CTCF	JUND	GABPA	K562	31837	4226	6898	0.132739	0.216666
CTCF	JUND	GABPA	MCF-7	7105	886	3067	0.124701	0.431668
CTCF	JUND	GABPA	GM12878	2187	604	818	0.276177	0.374028
CTCF	JUND	TAF1	A549	8463	1729	3374	0.204301	0.398677
CTCF	JUND	TAF1	H1-hESC	5177	860	2505	0.166119	0.483871
CTCF	JUND	TAF1	HeLa-S3	18508	1776	2914	0.0959585	0.157445
CTCF	JUND	TAF1	HepG2	5421	505	1062	0.0931562	0.195905
CTCF	JUND	TAF1	K562	31837	3895	9080	0.122342	0.285203
CTCF	JUND	TAF1	GM12878	2187	753	1120	0.344307	0.512117
CTCF	MAX	E2F1	HeLa-S3	26288	3943	6697	0.149992	0.254755
CTCF	MAX	E2F1	K562	46064	5086	10867	0.110412	0.235911
CTCF	MAX	E2F1	GM12878	8430	1444	4024	0.171293	0.477343
CTCF	MAX	GABPA	H1-hESC	39048	1616	10104	0.041385	0.258758
CTCF	MAX	GABPA	HeLa-S3	26288	4366	6143	0.166083	0.233681
CTCF	MAX	GABPA	HepG2	31404	2287	9802	0.0728251	0.312126
CTCF	MAX	GABPA	K562	46064	5999	9427	0.130232	0.20465
CTCF	MAX	GABPA	GM12878	8430	1785	2910	0.211744	0.345196
CTCF	MAX	JUND	A549	31268	1343	11135	0.0429513	0.356115
CTCF	MAX	JUND	H1-hESC	39048	3308	5501	0.0847162	0.140878
CTCF	MAX	JUND	HeLa-S3	26288	2279	11223	0.0866935	0.426925
CTCF	MAX	JUND	HepG2	31404	3925	6716	0.124984	0.213858
CTCF	MAX	JUND	K562	46064	2497	20364	0.0542072	0.442081
CTCF	MAX	JUND	HCT116	31734	9498	13438	0.2993	0.423457
CTCF	MAX	JUND	GM12878	8430	2812	4669	0.333571	0.553855
CTCF	MAX	TAF1	A549	31268	3703	8546	0.118428	0.273315
CTCF	MAX	TAF1	H1-hESC	39048	2491	9855	0.0637933	0.252382
CTCF	MAX	TAF1	HeLa-S3	26288	6561	9327	0.249582	0.354801
CTCF	MAX	TAF1	HepG2	31404	3926	10671	0.125016	0.339797
CTCF	MAX	TAF1	K562	46064	6181	13452	0.134183	0.292028
CTCF	MAX	TAF1	GM12878	8430	2950	4518	0.349941	0.535943
CTCF	MAX	TAF1	A549	31268	3703	8546	0.118428	0.273315
CTCF	MAX	TAF1	H1-hESC	39048	2491	9855	0.0637933	0.252382
CTCF	MAX	TAF1	HeLa-S3	26288	6561	9327	0.249582	0.354801
CTCF	MAX	TAF1	HepG2	31404	3926	10671	0.125016	0.339797
CTCF	MAX	TAF1	K562	46064	6181	13452	0.134183	0.292028
CTCF	MAX	TAF1	GM12878	8430	2950	4518	0.349941	0.535943
CTCF	REST	E2F1	HeLa-S3	2556	349	539	0.136541	0.210876
CTCF	REST	E2F1	K562	3865	541	1180	0.139974	0.305304
CTCF	REST	E2F1	GM12878	808	62	222	0.0767327	0.274752
CTCF	REST	GABPA	H1-hESC	6476	252	1591	0.0389129	0.245676
CTCF	REST	GABPA	HeLa-S3	2556	447	645	0.174883	0.252347
CTCF	REST	GABPA	HepG2	4334	718	1697	0.165667	0.391555
CTCF	REST	GABPA	K562	3865	672	1475	0.173868	0.38163
CTCF	REST	GABPA	MCF-7	5803	584	1945	0.100638	0.335171
CTCF	REST	GABPA	GM12878	808	142	200	0.175743	0.247525
CTCF	REST	JUND	A549	2995	179	995	0.0597663	0.33222
CTCF	REST	JUND	H1-hESC	6476	529	904	0.0816862	0.139592
CTCF	REST	JUND	HeLa-S3	2556	272	934	0.106416	0.365415
CTCF	REST	JUND	HepG2	4334	587	1258	0.135441	0.290263
CTCF	REST	JUND	K562	3865	256	2497	0.0662354	0.646054
CTCF	REST	JUND	MCF-7	5803	1345	2197	0.231777	0.378597
CTCF	REST	TAF1	A549	2995	742	1433	0.247746	0.478464
CTCF	REST	TAF1	H1-hESC	6476	469	1342	0.0724212	0.207227
CTCF	REST	TAF1	HeLa-S3	2556	587	795	0.229656	0.311033
CTCF	REST	TAF1	HepG2	4334	1378	2396	0.317951	0.552838
CTCF	REST	TAF1	K562	3865	738	1924	0.190944	0.497801
CTCF	REST	TAF1	GM12878	808	170	238	0.210396	0.294554
CTCF	TAF1	E2F1	HeLa-S3	7632	2262	3615	0.296384	0.473664
CTCF	TAF1	E2F1	K562	13413	3516	6867	0.262134	0.511966
CTCF	TAF1	E2F1	GM12878	5859	1144	3191	0.195255	0.544632
CTCF	TAF1	GABPA	H1-hESC	17203	1672	5567	0.0971923	0.323606
CTCF	TAF1	GABPA	HeLa-S3	7632	1267	2383	0.166012	0.312238
CTCF	TAF1	GABPA	HepG2	7244	1418	3317	0.195748	0.457896
CTCF	TAF1	GABPA	K562	13413	4153	6055	0.309625	0.451428
CTCF	TAF1	GABPA	GM12878	5859	1688	2508	0.288104	0.428059
CTCF	TAF1	GABPA	H1-hESC	17203	1672	5567	0.0971923	0.323606
CTCF	TAF1	GABPA	HeLa-S3	7632	1267	2383	0.166012	0.312238
CTCF	TAF1	GABPA	HepG2	7244	1418	3317	0.195748	0.457896
CTCF	TAF1	GABPA	K562	13413	4153	6055	0.309625	0.451428
CTCF	TAF1	GABPA	GM12878	5859	1688	2508	0.288104	0.428059
CTCF	TAF1	JUND	A549	6183	621	3351	0.100437	0.54197
CTCF	TAF1	JUND	H1-hESC	17203	2695	4426	0.156659	0.257281
CTCF	TAF1	JUND	HeLa-S3	7632	1097	3478	0.143737	0.455713
CTCF	TAF1	JUND	HepG2	7244	590	1603	0.0814467	0.221287
CTCF	TAF1	JUND	K562	13413	911	7535	0.0679192	0.561768
CTCF	TAF1	JUND	GM12878	5859	2302	2580	0.3929	0.440348
E2F1	EGR1	CTCF	GM12878	18052	2773	3598	0.153612	0.199313
E2F1	EGR1	CTCF	K562	19017	1418	3587	0.0745649	0.188621
E2F1	EGR1	CTCF	GM12878	18052	2773	3598	0.153612	0.199313
E2F1	EGR1	CTCF	K562	19017	1418	3587	0.0745649	0.188621
E2F1	EGR1	GABPA	GM12878	18052	5963	7343	0.330324	0.406769
E2F1	EGR1	GABPA	K562	19017	3404	7113	0.178998	0.374034
E2F1	EGR1	JUND	GM12878	18052	6719	7810	0.372203	0.432639
E2F1	EGR1	JUND	K562	19017	1705	8887	0.0896566	0.467319
E2F1	EGR1	TAF1	GM12878	18052	9171	12287	0.508032	0.680645
E2F1	EGR1	TAF1	K562	19017	6392	11770	0.33612	0.61892
E2F1	GABPA	CTCF	GM12878	12529	1817	2401	0.145024	0.191635
E2F1	GABPA	CTCF	HeLa-S3	8182	950	1877	0.116109	0.229406
E2F1	GABPA	CTCF	K562	11743	1077	2276	0.0917142	0.193818
E2F1	GABPA	CTCF	GM12878	12529	1817	2401	0.145024	0.191635
E2F1	GABPA	CTCF	HeLa-S3	8182	950	1877	0.116109	0.229406
E2F1	GABPA	CTCF	K562	11743	1077	2276	0.0917142	0.193818
E2F1	GABPA	TAF1	GM12878	12529	7883	10275	0.62918	0.820097
E2F1	GABPA	TAF1	HeLa-S3	8182	4402	6730	0.53801	0.822537
E2F1	GABPA	TAF1	K562	11743	5586	9105	0.475688	0.775356
E2F1	JUND	CTCF	GM12878	6887	1001	1282	0.145346	0.186148
E2F1	JUND	CTCF	HeLa-S3	4763	509	1097	0.106865	0.230317
E2F1	JUND	CTCF	K562	16170	2133	3812	0.131911	0.235745
E2F1	JUND	CTCF	GM12878	6887	1001	1282	0.145346	0.186148
E2F1	JUND	CTCF	HeLa-S3	4763	509	1097	0.106865	0.230317
E2F1	JUND	CTCF	K562	16170	2133	3812	0.131911	0.235745
E2F1	JUND	GABPA	GM12878	6887	2002	2634	0.290693	0.38246
E2F1	JUND	GABPA	HeLa-S3	4763	901	1930	0.189166	0.405207
E2F1	JUND	GABPA	K562	16170	3983	7204	0.24632	0.445516
E2F1	JUND	GABPA	GM12878	6887	2002	2634	0.290693	0.38246
E2F1	JUND	GABPA	HeLa-S3	4763	901	1930	0.189166	0.405207
E2F1	JUND	GABPA	K562	16170	3983	7204	0.24632	0.445516
E2F1	JUND	TAF1	GM12878	6887	2920	4462	0.423987	0.647887
E2F1	JUND	TAF1	HeLa-S3	4763	1529	3104	0.321016	0.65169
E2F1	JUND	TAF1	K562	16170	6456	10973	0.399258	0.678602
E2F1	MAX	CTCF	GM12878	30142	4001	5421	0.132738	0.179849
E2F1	MAX	CTCF	HeLa-S3	28133	3209	6142	0.114065	0.21832
E2F1	MAX	CTCF	K562	27788	2982	5448	0.107313	0.196056
E2F1	MAX	CTCF	GM12878	30142	4001	5421	0.132738	0.179849
E2F1	MAX	CTCF	HeLa-S3	28133	3209	6142	0.114065	0.21832
E2F1	MAX	CTCF	K562	27788	2982	5448	0.107313	0.196056
E2F1	MAX	GABPA	GM12878	30142	8784	11654	0.291421	0.386637
E2F1	MAX	GABPA	HeLa-S3	28133	5426	10040	0.19287	0.356876
E2F1	MAX	GABPA	K562	27788	5165	10222	0.185872	0.367857
E2F1	MAX	GABPA	GM12878	30142	8784	11654	0.291421	0.386637
E2F1	MAX	GABPA	HeLa-S3	28133	5426	10040	0.19287	0.356876
E2F1	MAX	GABPA	K562	27788	5165	10222	0.185872	0.367857
E2F1	MAX	TAF1	GM12878	30142	14215	20667	0.471601	0.685655
E2F1	MAX	TAF1	HeLa-S3	28133	10517	19178	0.373831	0.681691
E2F1	MAX	TAF1	K562	27788	10445	18286	0.375882	0.658054
E2F1	MAX	TAF1	GM12878	30142	14215	20667	0.471601	0.685655
E2F1	MAX	TAF1	HeLa-S3	28133	10517	19178	0.373831	0.681691
E2F1	MAX	TAF1	K562	27788	10445	18286	0.375882	0.658054
E2F1	REST	CTCF	GM12878	1871	233	328	0.124532	0.175307
E2F1	REST	CTCF	HeLa-S3	2393	277	562	0.115754	0.234852
E2F1	REST	CTCF	K562	3621	371	751	0.102458	0.207401
E2F1	REST	CTCF	GM12878	1871	233	328	0.124532	0.175307
E2F1	REST	CTCF	HeLa-S3	2393	277	562	0.115754	0.234852
E2F1	REST	CTCF	K562	3621	371	751	0.102458	0.207401
E2F1	REST	GABPA	GM12878	1871	589	747	0.314805	0.399252
E2F1	REST	GABPA	HeLa-S3	2393	654	1125	0.273297	0.470121
E2F1	REST	GABPA	K562	3621	772	1822	0.213201	0.503176
E2F1	REST	GABPA	GM12878	1871	589	747	0.314805	0.399252
E2F1	REST	GABPA	HeLa-S3	2393	654	1125	0.273297	0.470121
E2F1	REST	GABPA	K562	3621	772	1822	0.213201	0.503176
E2F1	REST	TAF1	GM12878	1871	1086	1430	0.580438	0.764297
E2F1	REST	TAF1	HeLa-S3	2393	1296	1932	0.54158	0.807355
E2F1	REST	TAF1	K562	3621	1527	2749	0.421707	0.759183
E2F1	TAF1	CTCF	GM12878	28066	3458	4623	0.12321	0.164719
E2F1	TAF1	CTCF	HeLa-S3	19891	1946	3840	0.0978332	0.193052
E2F1	TAF1	CTCF	K562	20903	1736	3608	0.0830503	0.172607
E2F1	TAF1	GABPA	GM12878	28066	9367	12107	0.333749	0.431376
E2F1	TAF1	GABPA	HeLa-S3	19891	4384	8008	0.220401	0.402594
E2F1	TAF1	GABPA	K562	20903	4740	8731	0.226762	0.417691
EGR1	FOXA1	GABPA	MCF-7	5456	949	2494	0.173937	0.457111
EGR1	FOXA1	GABPA	liver	30259	2160	15120	0.0713837	0.499686
EGR1	FOXA1	GABPA	MCF-7	5456	949	2494	0.173937	0.457111
EGR1	FOXA1	GABPA	liver	30259	2160	15120	0.0713837	0.499686
EGR1	FOXA1	JUND	MCF-7	5456	1079	3032	0.197764	0.555718
EGR1	FOXA1	JUND	liver	30259	2129	25511	0.0703592	0.843088
EGR1	GABPA	CTCF	GM12878	8679	1396	2103	0.160848	0.242309
EGR1	GABPA	CTCF	H1-hESC	9020	2027	3608	0.224723	0.4
EGR1	GABPA	CTCF	MCF-7	18829	1562	3293	0.0829571	0.17489
EGR1	GABPA	CTCF	K562	20094	2568	4243	0.127799	0.211158
EGR1	GABPA	E2F1	GM12878	8679	2408	5305	0.277451	0.611246
EGR1	GABPA	E2F1	K562	20094	8249	10019	0.410521	0.498607
EGR1	GABPA	JUND	GM12878	8679	1305	4985	0.150363	0.574375
EGR1	GABPA	JUND	H1-hESC	9020	817	3166	0.0905765	0.350998
EGR1	GABPA	JUND	MCF-7	18829	2613	7965	0.138775	0.423018
EGR1	GABPA	JUND	K562	20094	2764	12178	0.137553	0.606052
EGR1	GABPA	JUND	liver	49356	10702	36462	0.216833	0.738755
EGR1	GABPA	TAF1	GM12878	8679	2984	7187	0.343818	0.828091
EGR1	GABPA	TAF1	H1-hESC	9020	3560	6122	0.394678	0.678714
EGR1	GABPA	TAF1	K562	20094	10139	15104	0.504578	0.751667
EGR1	GABPA	TAF1	liver	49356	10882	25375	0.22048	0.514122
EGR1	JUND	ATF3	H1-hESC	8188	2368	3773	0.289204	0.460796
EGR1	JUND	ATF3	HCT116	63355	5103	38115	0.0805461	0.60161
EGR1	JUND	ATF3	K562	37584	8153	24659	0.216927	0.656104
EGR1	JUND	CTCF	GM12878	6652	958	1379	0.144017	0.207306
EGR1	JUND	CTCF	H1-hESC	8188	1152	2127	0.140694	0.25977
EGR1	JUND	CTCF	HCT116	63355	5532	7727	0.0873175	0.121964
EGR1	JUND	CTCF	MCF-7	11008	367	1671	0.0333394	0.151799
EGR1	JUND	CTCF	K562	37584	5419	8318	0.144184	0.221318
EGR1	JUND	E2F1	GM12878	6652	1069	2683	0.160704	0.403337
EGR1	JUND	E2F1	K562	37584	9519	12262	0.253273	0.326256
EGR1	JUND	GABPA	GM12878	6652	1930	2576	0.290138	0.387252
EGR1	JUND	GABPA	H1-hESC	8188	1835	3840	0.224108	0.468979
EGR1	JUND	GABPA	MCF-7	11008	1047	6036	0.0951126	0.548328
EGR1	JUND	GABPA	K562	37584	9734	15270	0.258993	0.40629
EGR1	JUND	GABPA	liver	64571	3604	31372	0.0558145	0.485853
EGR1	JUND	GABPA	GM12878	6652	1930	2576	0.290138	0.387252
EGR1	JUND	GABPA	H1-hESC	8188	1835	3840	0.224108	0.468979
EGR1	JUND	GABPA	MCF-7	11008	1047	6036	0.0951126	0.548328
EGR1	JUND	GABPA	K562	37584	9734	15270	0.258993	0.40629
EGR1	JUND	GABPA	liver	64571	3604	31372	0.0558145	0.485853
EGR1	MAX	CTCF	GM12878	19622	2922	3998	0.148914	0.203751
EGR1	MAX	CTCF	H1-hESC	20889	3432	6374	0.164297	0.305137
EGR1	MAX	CTCF	HCT116	95831	11233	15217	0.117217	0.15879
EGR1	MAX	CTCF	K562	57466	3817	10981	0.0664219	0.191087
EGR1	MAX	E2F1	GM12878	19622	4200	9834	0.214045	0.501172
EGR1	MAX	E2F1	K562	57466	16907	21236	0.294209	0.36954
EGR1	MAX	GABPA	GM12878	19622	7372	9326	0.375701	0.475283
EGR1	MAX	GABPA	H1-hESC	20889	3985	9310	0.19077	0.445689
EGR1	MAX	GABPA	K562	57466	6005	17704	0.104497	0.308078
EGR1	MAX	GABPA	liver	79086	7831	40887	0.0990188	0.516994
EGR1	MAX	GABPA	GM12878	19622	7372	9326	0.375701	0.475283
EGR1	MAX	GABPA	H1-hESC	20889	3985	9310	0.19077	0.445689
EGR1	MAX	GABPA	K562	57466	6005	17704	0.104497	0.308078
EGR1	MAX	GABPA	liver	79086	7831	40887	0.0990188	0.516994
EGR1	MAX	JUND	GM12878	19622	2430	8833	0.123841	0.450158
EGR1	MAX	JUND	H1-hESC	20889	1621	6491	0.0776007	0.310738
EGR1	MAX	JUND	HCT116	95831	9245	50556	0.0964719	0.527554
EGR1	MAX	JUND	K562	57466	16994	31493	0.295723	0.548028
EGR1	MAX	JUND	liver	79086	11379	61360	0.143881	0.775864
EGR1	MAX	TAF1	GM12878	19622	4667	13103	0.237845	0.667771
EGR1	MAX	TAF1	H1-hESC	20889	5669	12467	0.271387	0.596821
EGR1	MAX	TAF1	K562	57466	21328	32836	0.371141	0.571399
EGR1	MAX	TAF1	liver	79086	10361	29933	0.131009	0.378487
EGR1	REST	CTCF	GM12878	1400	219	344	0.156429	0.245714
EGR1	REST	CTCF	H1-hESC	3805	560	1048	0.147175	0.275427
EGR1	REST	CTCF	MCF-7	5721	478	1165	0.0835518	0.203636
EGR1	REST	CTCF	K562	9591	939	1746	0.0979043	0.182046
EGR1	REST	E2F1	GM12878	1400	267	652	0.190714	0.465714
EGR1	REST	E2F1	K562	9591	1863	2853	0.194245	0.297466
EGR1	REST	GABPA	GM12878	1400	508	635	0.362857	0.453571
EGR1	REST	GABPA	H1-hESC	3805	815	1837	0.214192	0.482786
EGR1	REST	GABPA	MCF-7	5721	758	3469	0.132494	0.606363
EGR1	REST	GABPA	K562	9591	1952	4642	0.203524	0.483995
EGR1	REST	GABPA	liver	66883	7147	38849	0.106858	0.58085
EGR1	REST	GABPA	GM12878	1400	508	635	0.362857	0.453571
EGR1	REST	GABPA	H1-hESC	3805	815	1837	0.214192	0.482786
EGR1	REST	GABPA	MCF-7	5721	758	3469	0.132494	0.606363
EGR1	REST	GABPA	K562	9591	1952	4642	0.203524	0.483995
EGR1	REST	GABPA	liver	66883	7147	38849	0.106858	0.58085
EGR1	REST	JUND	GM12878	1400	111	585	0.0792857	0.417857
EGR1	REST	JUND	H1-hESC	3805	351	1657	0.092247	0.43548
EGR1	REST	JUND	MCF-7	5721	750	2976	0.131096	0.520189
EGR1	REST	JUND	K562	9591	1128	6953	0.11761	0.72495
EGR1	REST	JUND	liver	66883	10428	50463	0.155914	0.754497
EGR1	TAF1	CTCF	GM12878	20210	2608	3685	0.129045	0.182335
EGR1	TAF1	CTCF	H1-hESC	21640	2755	5297	0.127311	0.244778
EGR1	TAF1	CTCF	K562	35805	3033	6335	0.0847088	0.176931
EGR1	TAF1	E2F1	GM12878	20210	4141	9945	0.204899	0.492083
EGR1	TAF1	E2F1	K562	35805	13478	16844	0.376428	0.470437
EGR1	TAF1	E2F1	GM12878	20210	4141	9945	0.204899	0.492083
EGR1	TAF1	E2F1	K562	35805	13478	16844	0.376428	0.470437
EGR1	TAF1	GABPA	GM12878	20210	8162	10253	0.403859	0.507323
EGR1	TAF1	GABPA	H1-hESC	21640	5123	10675	0.236738	0.493299
EGR1	TAF1	GABPA	K562	35805	4713	13899	0.13163	0.388186
EGR1	TAF1	GABPA	liver	29907	5352	18474	0.178955	0.617715
EGR1	TAF1	JUND	GM12878	20210	2485	9195	0.122959	0.454973
EGR1	TAF1	JUND	H1-hESC	21640	1963	7739	0.0907116	0.357625
EGR1	TAF1	JUND	K562	35805	4417	17336	0.123363	0.484178
EGR1	TAF1	JUND	liver	29907	6796	21289	0.227238	0.71184
FOXA1	FOXA2	GABPA	HepG2	155075	17277	18626	0.111411	0.12011
FOXA1	FOXA2	GABPA	liver	76313	999	17107	0.0130908	0.224169
FOXA1	FOXA2	HNF4A	HepG2	155075	52456	68479	0.338262	0.441586
FOXA1	FOXA2	HNF4A	liver	76313	14938	54942	0.195746	0.719956
FOXA1	GABPA	CTCF	HepG2	6175	1013	1330	0.164049	0.215385
FOXA1	GABPA	CTCF	MCF-7	12159	467	1392	0.0384078	0.114483
FOXA1	GABPA	FOXA2	HepG2	6175	1771	3740	0.286802	0.605668
FOXA1	GABPA	FOXA2	liver	25367	14048	21083	0.55379	0.831119
FOXA1	GABPA	HNF4A	HepG2	6175	2841	3606	0.460081	0.583968
FOXA1	GABPA	HNF4A	liver	25367	6528	21194	0.257342	0.835495
FOXA1	GABPA	TAF1	HepG2	6175	2204	3774	0.356923	0.611174
FOXA1	GABPA	TAF1	liver	25367	1698	8326	0.0669374	0.328222
FOXA1	HNF4A	FOXA2	HepG2	50831	18697	41475	0.367827	0.815939
FOXA1	HNF4A	FOXA2	liver	70068	36875	60580	0.526274	0.864589
FOXA1	HNF4A	GABPA	HepG2	50831	9641	10414	0.189668	0.204875
FOXA1	HNF4A	GABPA	liver	70068	927	20048	0.01323	0.286122
FOXA1	HNF4A	JUND	HepG2	50831	19502	24247	0.383664	0.477012
FOXA1	HNF4A	JUND	liver	70068	8286	45580	0.118257	0.650511
FOXA1	HNF4A	MAX	HepG2	50831	18088	32277	0.355846	0.634987
FOXA1	HNF4A	MAX	liver	70068	16775	44564	0.23941	0.636011
FOXA1	JUND	CTCF	HepG2	27681	1451	1941	0.0524186	0.0701203
FOXA1	JUND	CTCF	MCF-7	23726	459	1590	0.0193459	0.0670151
FOXA1	JUND	FOXA2	HepG2	27681	9369	24674	0.338463	0.89137
FOXA1	JUND	FOXA2	liver	54478	28525	45994	0.523606	0.844267
FOXA1	JUND	GABPA	HepG2	27681	5178	6732	0.18706	0.243199
FOXA1	JUND	GABPA	MCF-7	23726	363	8037	0.0152997	0.338742
FOXA1	JUND	GABPA	liver	54478	2551	19191	0.0468262	0.352271
FOXA1	JUND	HNF4A	HepG2	27681	13047	16765	0.471334	0.60565
FOXA1	JUND	HNF4A	liver	54478	13213	46738	0.242538	0.857924
FOXA1	MAX	FOXA2	HepG2	57315	19979	44850	0.348582	0.782518
FOXA1	MAX	FOXA2	liver	51642	26504	42914	0.513226	0.83099
FOXA1	MAX	GABPA	HepG2	57315	13315	15123	0.232313	0.263858
FOXA1	MAX	GABPA	liver	51642	1075	20396	0.0208164	0.39495
FOXA1	MAX	HNF4A	HepG2	57315	27602	37164	0.481584	0.648417
FOXA1	MAX	HNF4A	liver	51642	12170	43533	0.235661	0.842977
FOXA1	MAX	TAF1	HepG2	57315	8489	12503	0.148111	0.218145
FOXA1	MAX	TAF1	liver	51642	2082	12800	0.040316	0.24786
FOXA1	REST	CTCF	HepG2	20367	1118	1736	0.0548927	0.0852359
FOXA1	REST	CTCF	MCF-7	5825	203	730	0.0348498	0.125322
FOXA1	REST	FOXA2	HepG2	20367	8297	16894	0.407375	0.829479
FOXA1	REST	FOXA2	liver	45171	23797	37197	0.52682	0.823471
FOXA1	REST	GABPA	HepG2	20367	6313	7676	0.309962	0.376884
FOXA1	REST	GABPA	MCF-7	5825	179	2987	0.0307296	0.51279
FOXA1	REST	GABPA	liver	45171	2693	19751	0.0596179	0.43725
FOXA1	REST	HNF4A	HepG2	20367	11913	15943	0.584917	0.782786
FOXA1	REST	HNF4A	liver	45171	11096	37703	0.245644	0.834673
FOXA1	TAF1	FOXA2	HepG2	8763	2904	5629	0.331393	0.64236
FOXA1	TAF1	FOXA2	liver	16137	8747	13051	0.542046	0.808762
FOXA1	TAF1	GABPA	HepG2	8763	4063	4831	0.463654	0.551295
FOXA1	TAF1	GABPA	liver	16137	658	7657	0.0407759	0.4745
FOXA1	TAF1	GABPA	HepG2	8763	4063	4831	0.463654	0.551295
FOXA1	TAF1	GABPA	liver	16137	658	7657	0.0407759	0.4745
FOXA1	TAF1	HNF4A	HepG2	8763	4354	5374	0.496862	0.61326
FOXA1	TAF1	HNF4A	liver	16137	4175	12926	0.258722	0.801016
FOXA1	TAF1	HNF4A	HepG2	8763	4354	5374	0.496862	0.61326
FOXA1	TAF1	HNF4A	liver	16137	4175	12926	0.258722	0.801016
FOXA2	GABPA	FOXA1	HepG2	6163	1030	3954	0.167126	0.641571
FOXA2	GABPA	FOXA1	liver	29932	14694	21771	0.490913	0.727349
FOXA2	GABPA	HNF4A	HepG2	6163	2964	3546	0.480935	0.575369
FOXA2	GABPA	HNF4A	liver	29932	8322	25714	0.27803	0.859081
FOXA2	GABPA	TAF1	HepG2	6163	2318	3728	0.376116	0.6049
FOXA2	GABPA	TAF1	liver	29932	3064	10418	0.102365	0.348056
FOXA2	HNF4A	FOXA1	HepG2	48449	15507	42837	0.320069	0.884167
FOXA2	HNF4A	FOXA1	liver	90042	42890	65706	0.476333	0.729726
FOXA2	HNF4A	GABPA	HepG2	48449	9720	10350	0.200623	0.213627
FOXA2	HNF4A	GABPA	liver	90042	2025	24935	0.0224895	0.276926
FOXA2	HNF4A	JUND	HepG2	48449	19607	24764	0.404694	0.511135
FOXA2	HNF4A	JUND	liver	90042	10378	55232	0.115257	0.613403
FOXA2	HNF4A	MAX	HepG2	48449	17908	31595	0.369626	0.652129
FOXA2	HNF4A	MAX	liver	90042	22837	56266	0.253626	0.624886
FOXA2	JUND	FOXA1	HepG2	34082	8549	26201	0.250836	0.768764
FOXA2	JUND	FOXA1	liver	62476	29737	46511	0.475975	0.744462
FOXA2	JUND	GABPA	HepG2	34082	5828	6098	0.170999	0.178921
FOXA2	JUND	GABPA	liver	62476	1391	21849	0.0222646	0.349718
FOXA2	JUND	HNF4A	HepG2	34082	14632	18761	0.429318	0.550467
FOXA2	JUND	HNF4A	liver	62476	16407	55692	0.262613	0.891414
FOXA2	MAX	FOXA1	HepG2	65106	17525	49776	0.269176	0.764538
FOXA2	MAX	FOXA1	liver	60402	27968	43675	0.463031	0.723072
FOXA2	MAX	GABPA	HepG2	65106	15165	16830	0.232928	0.258502
FOXA2	MAX	GABPA	liver	60402	2278	24382	0.037714	0.403662
FOXA2	MAX	HNF4A	HepG2	65106	30236	39912	0.464412	0.613031
FOXA2	MAX	HNF4A	liver	60402	15486	52831	0.256382	0.874656
FOXA2	MAX	TAF1	HepG2	65106	9595	13518	0.147375	0.207631
FOXA2	MAX	TAF1	liver	60402	3439	15408	0.0569352	0.255091
FOXA2	REST	FOXA1	HepG2	20817	7593	18082	0.36475	0.868617
FOXA2	REST	FOXA1	liver	51354	24467	37438	0.476438	0.729018
FOXA2	REST	GABPA	HepG2	20817	6587	7167	0.316424	0.344286
FOXA2	REST	GABPA	liver	51354	2137	22940	0.0416131	0.446703
FOXA2	REST	HNF4A	HepG2	20817	12303	16205	0.591007	0.77845
FOXA2	REST	HNF4A	liver	51354	13780	44608	0.268334	0.868637
FOXA2	TAF1	FOXA1	HepG2	9306	2067	6146	0.222115	0.660434
FOXA2	TAF1	FOXA1	liver	19201	9509	13833	0.495235	0.720431
FOXA2	TAF1	GABPA	HepG2	9306	4499	5155	0.483452	0.553944
FOXA2	TAF1	GABPA	liver	19201	1520	9359	0.0791625	0.487423
FOXA2	TAF1	GABPA	HepG2	9306	4499	5155	0.483452	0.553944
FOXA2	TAF1	GABPA	liver	19201	1520	9359	0.0791625	0.487423
FOXA2	TAF1	HNF4A	HepG2	9306	4632	5505	0.497743	0.591554
FOXA2	TAF1	HNF4A	liver	19201	5194	15656	0.270507	0.815374
FOXA2	TAF1	HNF4A	HepG2	9306	4632	5505	0.497743	0.591554
FOXA2	TAF1	HNF4A	liver	19201	5194	15656	0.270507	0.815374
GABPA	HNF4A	FOXA2	HepG2	6185	804	1891	0.129992	0.30574
GABPA	HNF4A	FOXA2	liver	67930	21246	33150	0.312763	0.488002
GABPA	HNF4A	JUND	HepG2	6185	1497	1804	0.242037	0.291673
GABPA	HNF4A	JUND	liver	67930	7814	43030	0.11503	0.633446
GABPA	HNF4A	MAX	HepG2	6185	2734	5489	0.442037	0.88747
GABPA	HNF4A	MAX	liver	67930	28596	57437	0.420963	0.845532
GABPA	HNF4A	TAF1	HepG2	6185	1983	3793	0.320614	0.613258
GABPA	HNF4A	TAF1	liver	67930	11998	27217	0.176623	0.400662
GABPA	JUND	ATF3	H1-hESC	4840	1605	2075	0.331612	0.428719
GABPA	JUND	ATF3	HepG2	3200	1095	2619	0.342187	0.818438
GABPA	JUND	ATF3	K562	22615	2167	12763	0.0958214	0.56436
GABPA	JUND	CTCF	GM12878	2751	499	740	0.181389	0.268993
GABPA	JUND	CTCF	H1-hESC	4840	990	1812	0.204545	0.37438
GABPA	JUND	CTCF	HeLa-S3	6338	800	1161	0.126223	0.183181
GABPA	JUND	CTCF	HepG2	3200	418	624	0.130625	0.195
GABPA	JUND	CTCF	MCF-7	23490	1215	3030	0.0517241	0.128991
GABPA	JUND	CTCF	K562	22615	3911	5872	0.172938	0.259651
GABPA	JUND	HNF4A	HepG2	3200	1327	1603	0.414687	0.500938
GABPA	JUND	HNF4A	liver	53564	11843	43842	0.2211	0.818497
GABPA	JUND	TAF1	GM12878	2751	1098	2357	0.399128	0.856779
GABPA	JUND	TAF1	H1-hESC	4840	2247	3606	0.464256	0.745041
GABPA	JUND	TAF1	HeLa-S3	6338	2487	4105	0.392395	0.647681
GABPA	JUND	TAF1	HepG2	3200	1482	2485	0.463125	0.776563
GABPA	JUND	TAF1	K562	22615	8568	16218	0.378864	0.717135
GABPA	JUND	TAF1	liver	53564	6638	20613	0.123927	0.384829
GABPA	MAX	CTCF	GM12878	11966	1784	2469	0.149089	0.206335
GABPA	MAX	CTCF	H1-hESC	22676	5337	10162	0.235359	0.448139
GABPA	MAX	CTCF	HeLa-S3	18232	2183	3156	0.119735	0.173102
GABPA	MAX	CTCF	HepG2	36467	4408	6679	0.120876	0.183152
GABPA	MAX	CTCF	K562	32788	4064	6996	0.123948	0.213371
GABPA	MAX	E2F1	GM12878	11966	3899	8528	0.32584	0.712686
GABPA	MAX	E2F1	HeLa-S3	18232	8223	10976	0.45102	0.602018
GABPA	MAX	E2F1	K562	32788	8423	17056	0.256893	0.52019
GABPA	MAX	HNF4A	HepG2	36467	10364	12988	0.284202	0.356158
GABPA	MAX	HNF4A	liver	78028	13541	55886	0.17354	0.71623
GABPA	MAX	TAF1	GM12878	11966	4271	9803	0.356928	0.819238
GABPA	MAX	TAF1	H1-hESC	22676	5423	11030	0.239152	0.486417
GABPA	MAX	TAF1	HeLa-S3	18232	10928	14384	0.599386	0.788943
GABPA	MAX	TAF1	HepG2	36467	15073	27823	0.413333	0.762964
GABPA	MAX	TAF1	K562	32788	12912	23271	0.393803	0.709741
GABPA	MAX	TAF1	liver	78028	16142	35630	0.206874	0.456631
GABPA	MAX	TAF1	GM12878	11966	4271	9803	0.356928	0.819238
GABPA	MAX	TAF1	H1-hESC	22676	5423	11030	0.239152	0.486417
GABPA	MAX	TAF1	HeLa-S3	18232	10928	14384	0.599386	0.788943
GABPA	MAX	TAF1	HepG2	36467	15073	27823	0.413333	0.762964
GABPA	MAX	TAF1	K562	32788	12912	23271	0.393803	0.709741
GABPA	MAX	TAF1	liver	78028	16142	35630	0.206874	0.456631
GABPA	REST	CTCF	GM12878	809	111	195	0.137206	0.241038
GABPA	REST	CTCF	H1-hESC	4012	771	1482	0.192173	0.369392
GABPA	REST	CTCF	HeLa-S3	2331	273	414	0.117117	0.177606
GABPA	REST	CTCF	HepG2	9882	1015	1685	0.102712	0.170512
GABPA	REST	CTCF	MCF-7	10373	706	1761	0.0680613	0.169768
GABPA	REST	CTCF	K562	6952	799	1451	0.114931	0.208717
GABPA	REST	E2F1	GM12878	809	224	572	0.276885	0.707046
GABPA	REST	E2F1	HeLa-S3	2331	1090	1407	0.46761	0.603604
GABPA	REST	E2F1	K562	6952	1164	2590	0.167434	0.372555
GABPA	REST	HNF4A	HepG2	9882	3772	4787	0.381704	0.484416
GABPA	REST	HNF4A	liver	76743	13213	52733	0.172172	0.687138
GABPA	REST	TAF1	GM12878	809	356	648	0.440049	0.800989
GABPA	REST	TAF1	H1-hESC	4012	1212	1965	0.302094	0.489781
GABPA	REST	TAF1	HeLa-S3	2331	1582	1964	0.678679	0.842557
GABPA	REST	TAF1	HepG2	9882	6046	8769	0.611819	0.887371
GABPA	REST	TAF1	K562	6952	1804	4797	0.259494	0.690017
GABPA	REST	TAF1	liver	76743	16986	38418	0.221336	0.500606
GABPA	TAF1	CTCF	GM12878	13294	1877	2590	0.141192	0.194825
GABPA	TAF1	CTCF	H1-hESC	18669	2789	5509	0.149392	0.295088
GABPA	TAF1	CTCF	HeLa-S3	14878	1424	2173	0.0957118	0.146055
GABPA	TAF1	CTCF	HepG2	26254	2386	3758	0.0908814	0.14314
GABPA	TAF1	CTCF	K562	25694	2717	5056	0.105745	0.196777
GABPA	TAF1	E2F1	GM12878	13294	4053	9212	0.304874	0.692944
GABPA	TAF1	E2F1	HeLa-S3	14878	7249	9465	0.487229	0.636174
GABPA	TAF1	E2F1	K562	25694	7246	15109	0.282011	0.588036
GABPA	TAF1	HNF4A	HepG2	26254	7463	9022	0.284261	0.343643
GABPA	TAF1	HNF4A	liver	37571	5983	23797	0.159245	0.633387
HNF4A	JUND	FOXA2	HepG2	15566	5701	12371	0.366247	0.794745
HNF4A	JUND	FOXA2	liver	134600	42699	69905	0.317229	0.519354
HNF4A	JUND	GABPA	HepG2	15566	3913	4188	0.251381	0.269048
HNF4A	JUND	GABPA	liver	134600	4624	41760	0.0343536	0.310253
HNF4A	JUND	MAX	HepG2	15566	6751	11240	0.433702	0.722087
HNF4A	JUND	MAX	liver	134600	33497	93127	0.248863	0.69188
HNF4A	MAX	FOXA2	HepG2	46149	12664	27084	0.274415	0.586882
HNF4A	MAX	FOXA2	liver	135951	39287	65720	0.288979	0.483409
HNF4A	MAX	GABPA	HepG2	46149	11390	13616	0.246809	0.295044
HNF4A	MAX	GABPA	liver	135951	9574	52851	0.0704224	0.38875
HNF4A	MAX	JUND	HepG2	46149	16119	19959	0.349282	0.43249
HNF4A	MAX	JUND	liver	135951	13359	89372	0.0982633	0.657384
HNF4A	MAX	TAF1	HepG2	46149	7354	11773	0.159353	0.255108
HNF4A	MAX	TAF1	liver	135951	12812	36311	0.0942398	0.267089
HNF4A	REST	FOXA2	HepG2	17119	6385	12516	0.372977	0.731117
HNF4A	REST	FOXA2	liver	114281	34485	56029	0.301756	0.490274
HNF4A	REST	GABPA	HepG2	17119	5661	6484	0.330685	0.37876
HNF4A	REST	GABPA	liver	114281	8925	49685	0.078097	0.434762
HNF4A	REST	JUND	HepG2	17119	7721	9557	0.451019	0.558269
HNF4A	REST	JUND	liver	114281	11560	74197	0.101154	0.649251
HNF4A	REST	MAX	HepG2	17119	8503	14864	0.4967	0.868275
HNF4A	REST	MAX	liver	114281	38167	87678	0.333975	0.767214
HNF4A	TAF1	FOXA2	HepG2	8851	1570	3263	0.177381	0.368659
HNF4A	TAF1	FOXA2	liver	44405	13252	20438	0.298435	0.460263
HNF4A	TAF1	GABPA	HepG2	8851	3673	4739	0.414981	0.53542
HNF4A	TAF1	GABPA	liver	44405	6628	22844	0.149262	0.514447
HNF4A	TAF1	GABPA	HepG2	8851	3673	4739	0.414981	0.53542
HNF4A	TAF1	GABPA	liver	44405	6628	22844	0.149262	0.514447
HNF4A	TAF1	JUND	HepG2	8851	2622	3044	0.296238	0.343916
HNF4A	TAF1	JUND	liver	44405	4509	26039	0.101543	0.586398
HNF4A	TAF1	MAX	HepG2	8851	3942	7692	0.445373	0.869054
HNF4A	TAF1	MAX	liver	44405	19406	35237	0.437023	0.793537
JUND	MAX	ATF3	HCT116	107837	6503	49182	0.060304	0.456077
JUND	MAX	ATF3	HepG2	22243	5606	7575	0.252034	0.340557
JUND	MAX	ATF3	K562	71920	4762	41284	0.0662125	0.574027
JUND	MAX	ATF3	A549	48952	18047	29875	0.368667	0.610292
JUND	MAX	ATF3	H1-hESC	13700	2949	6838	0.215255	0.499124
JUND	MAX	CTCF	HCT116	107837	9237	13063	0.0856571	0.121137
JUND	MAX	CTCF	HeLa-S3	57658	5552	9980	0.0962919	0.17309
JUND	MAX	CTCF	HepG2	22243	1880	2602	0.084521	0.116981
JUND	MAX	CTCF	K562	71920	14078	19978	0.195745	0.277781
JUND	MAX	CTCF	A549	48952	5817	7923	0.118831	0.161852
JUND	MAX	CTCF	GM12878	8114	995	1554	0.122628	0.191521
JUND	MAX	CTCF	H1-hESC	13700	2032	3412	0.148321	0.249051
JUND	MAX	E2F1	HeLa-S3	57658	4015	6776	0.0696347	0.117521
JUND	MAX	E2F1	K562	71920	10243	21872	0.142422	0.304116
JUND	MAX	E2F1	GM12878	8114	1721	4145	0.212103	0.510845
JUND	MAX	GABPA	HeLa-S3	57658	7813	10908	0.135506	0.189185
JUND	MAX	GABPA	HepG2	22243	1682	7372	0.0756193	0.33143
JUND	MAX	GABPA	K562	71920	13482	22777	0.187458	0.316699
JUND	MAX	GABPA	GM12878	8114	2111	3150	0.260168	0.388218
JUND	MAX	GABPA	H1-hESC	13700	2624	5275	0.191533	0.385036
JUND	MAX	GABPA	liver	112974	2361	42956	0.0208986	0.380229
JUND	MAX	HNF4A	HepG2	22243	11034	14145	0.496066	0.63593
JUND	MAX	HNF4A	liver	112974	22511	92894	0.199258	0.82226
JUND	MAX	TAF1	HeLa-S3	57658	4731	16148	0.0820528	0.280065
JUND	MAX	TAF1	HepG2	22243	3491	7015	0.156948	0.31538
JUND	MAX	TAF1	K562	71920	14129	32166	0.196454	0.447247
JUND	MAX	TAF1	A549	48952	12439	18191	0.254106	0.371609
JUND	MAX	TAF1	GM12878	8114	2574	5124	0.317229	0.631501
JUND	MAX	TAF1	H1-hESC	13700	4434	9306	0.32365	0.67927
JUND	MAX	TAF1	liver	112974	9150	28941	0.0809921	0.256174
JUND	REST	ATF3	HepG2	8167	542	2659	0.0663646	0.325579
JUND	REST	ATF3	K562	14347	475	8652	0.033108	0.603053
JUND	REST	ATF3	A549	5502	2028	3299	0.368593	0.5996
JUND	REST	ATF3	H1-hESC	3435	934	1635	0.271907	0.475983
JUND	REST	CTCF	HeLa-S3	3994	475	722	0.118928	0.180771
JUND	REST	CTCF	HepG2	8167	370	612	0.0453043	0.0749357
JUND	REST	CTCF	K562	14347	1314	2598	0.0915871	0.181083
JUND	REST	CTCF	MCF-7	9336	478	1368	0.0511997	0.14653
JUND	REST	CTCF	A549	5502	785	1424	0.142675	0.258815
JUND	REST	CTCF	GM12878	425	61	88	0.143529	0.207059
JUND	REST	CTCF	H1-hESC	3435	391	715	0.113828	0.208151
JUND	REST	E2F1	HeLa-S3	3994	588	864	0.147221	0.216324
JUND	REST	E2F1	K562	14347	1419	3441	0.0989057	0.239841
JUND	REST	E2F1	GM12878	425	104	236	0.244706	0.555294
JUND	REST	GABPA	HeLa-S3	3994	922	1231	0.230846	0.308212
JUND	REST	GABPA	HepG2	8167	562	3293	0.0688135	0.403208
JUND	REST	GABPA	K562	14347	1865	5595	0.129992	0.389977
JUND	REST	GABPA	MCF-7	9336	918	5262	0.098329	0.563625
JUND	REST	GABPA	GM12878	425	179	218	0.421176	0.512941
JUND	REST	GABPA	H1-hESC	3435	658	1535	0.191557	0.44687
JUND	REST	GABPA	liver	92592	2154	39616	0.0232633	0.427856
JUND	REST	HNF4A	HepG2	8167	5167	6555	0.632668	0.80262
JUND	REST	HNF4A	liver	92592	19587	76478	0.211541	0.825968
JUND	TAF1	ATF3	HepG2	4132	1038	1940	0.25121	0.469506
JUND	TAF1	ATF3	K562	34469	3050	18641	0.0884853	0.540805
JUND	TAF1	ATF3	A549	15139	5459	9347	0.360592	0.617412
JUND	TAF1	ATF3	H1-hESC	16420	3964	8307	0.241413	0.505907
JUND	TAF1	CTCF	HeLa-S3	17553	1264	2224	0.0720105	0.126702
JUND	TAF1	CTCF	HepG2	4132	385	583	0.0931752	0.141094
JUND	TAF1	CTCF	K562	34469	4498	7863	0.130494	0.228118
JUND	TAF1	CTCF	A549	15139	2349	3188	0.155162	0.210582
JUND	TAF1	CTCF	GM12878	7661	722	1266	0.0942436	0.165253
JUND	TAF1	CTCF	H1-hESC	16420	1920	3273	0.116931	0.19933
JUND	TAF1	E2F1	HeLa-S3	17553	2895	4496	0.164929	0.256139
JUND	TAF1	E2F1	K562	34469	8101	17068	0.235023	0.49517
JUND	TAF1	E2F1	GM12878	7661	1550	3892	0.202323	0.508028
JUND	TAF1	GABPA	HeLa-S3	17553	4528	5910	0.257962	0.336695
JUND	TAF1	GABPA	HepG2	4132	1038	2633	0.25121	0.637222
JUND	TAF1	GABPA	K562	34469	11366	17399	0.329746	0.504772
JUND	TAF1	GABPA	GM12878	7661	2133	3121	0.278423	0.407388
JUND	TAF1	GABPA	H1-hESC	16420	3409	6238	0.207613	0.379903
JUND	TAF1	GABPA	liver	33500	1706	16912	0.0509254	0.504836
JUND	TAF1	GABPA	HeLa-S3	17553	4528	5910	0.257962	0.336695
JUND	TAF1	GABPA	HepG2	4132	1038	2633	0.25121	0.637222
JUND	TAF1	GABPA	K562	34469	11366	17399	0.329746	0.504772
JUND	TAF1	GABPA	GM12878	7661	2133	3121	0.278423	0.407388
JUND	TAF1	GABPA	H1-hESC	16420	3409	6238	0.207613	0.379903
JUND	TAF1	GABPA	liver	33500	1706	16912	0.0509254	0.504836
JUND	TAF1	HNF4A	HepG2	4132	1938	2275	0.469022	0.550581
JUND	TAF1	HNF4A	liver	33500	7488	26535	0.223522	0.79209
JUND	TAF1	HNF4A	HepG2	4132	1938	2275	0.469022	0.550581
JUND	TAF1	HNF4A	liver	33500	7488	26535	0.223522	0.79209
MAX	REST	CTCF	A549	14652	2120	2954	0.14469	0.201611
MAX	REST	CTCF	GM12878	2089	224	383	0.107228	0.183341
MAX	REST	CTCF	H1-hESC	11075	1353	2720	0.122167	0.245598
MAX	REST	CTCF	HeLa-S3	7528	959	1393	0.127391	0.185043
MAX	REST	CTCF	HepG2	33104	2027	3597	0.0612313	0.108658
MAX	REST	CTCF	K562	16314	1586	3025	0.0972171	0.185424
MAX	REST	E2F1	GM12878	2089	460	1165	0.220201	0.557683
MAX	REST	E2F1	HeLa-S3	7528	2255	3161	0.299548	0.419899
MAX	REST	E2F1	K562	16314	2213	4761	0.13565	0.291835
MAX	REST	GABPA	GM12878	2089	802	1009	0.383916	0.483006
MAX	REST	GABPA	H1-hESC	11075	1295	3908	0.11693	0.352867
MAX	REST	GABPA	HeLa-S3	7528	1292	2441	0.171626	0.324256
MAX	REST	GABPA	HepG2	33104	4292	9411	0.129652	0.284286
MAX	REST	GABPA	K562	16314	2499	6455	0.153181	0.395672
MAX	REST	GABPA	liver	112194	9465	54984	0.0843628	0.49008
MAX	REST	HNF4A	HepG2	33104	15302	20055	0.46224	0.605818
MAX	REST	HNF4A	liver	112194	20479	85217	0.182532	0.75955
MAX	REST	TAF1	A549	14652	4727	9580	0.322618	0.653836
MAX	REST	TAF1	GM12878	2089	1036	1372	0.495931	0.656774
MAX	REST	TAF1	H1-hESC	11075	2471	5232	0.223115	0.472415
MAX	REST	TAF1	HeLa-S3	7528	3451	4627	0.458422	0.614639
MAX	REST	TAF1	HepG2	33104	9967	16914	0.301081	0.510935
MAX	REST	TAF1	K562	16314	3109	8674	0.190573	0.531691
MAX	REST	TAF1	liver	112194	14953	43688	0.133278	0.389397
MAX	TAF1	CTCF	A549	42720	4890	7232	0.114466	0.169288
MAX	TAF1	CTCF	GM12878	30028	2626	5111	0.0874517	0.170208
MAX	TAF1	CTCF	H1-hESC	60079	6332	11479	0.105395	0.191065
MAX	TAF1	CTCF	HeLa-S3	47629	4270	6884	0.0896513	0.144534
MAX	TAF1	CTCF	HepG2	53597	4422	7131	0.0825046	0.133048
MAX	TAF1	CTCF	K562	61457	6475	11527	0.105358	0.187562
MAX	TAF1	E2F1	GM12878	30028	7221	17550	0.240476	0.584455
MAX	TAF1	E2F1	HeLa-S3	47629	15342	22654	0.322115	0.475635
MAX	TAF1	E2F1	K562	61457	16001	31574	0.260361	0.513758
MAX	TAF1	E2F1	GM12878	30028	7221	17550	0.240476	0.584455
MAX	TAF1	E2F1	HeLa-S3	47629	15342	22654	0.322115	0.475635
MAX	TAF1	E2F1	K562	61457	16001	31574	0.260361	0.513758
MAX	TAF1	GABPA	GM12878	30028	12627	15088	0.420508	0.502464
MAX	TAF1	GABPA	H1-hESC	60079	9106	23164	0.151567	0.385559
MAX	TAF1	GABPA	HeLa-S3	47629	6518	13881	0.136849	0.29144
MAX	TAF1	GABPA	HepG2	53597	9885	21968	0.184432	0.409874
MAX	TAF1	GABPA	K562	61457	18048	26512	0.293669	0.431391
MAX	TAF1	GABPA	liver	47169	7340	26433	0.155611	0.560389
MAX	TAF1	GABPA	GM12878	30028	12627	15088	0.420508	0.502464
MAX	TAF1	GABPA	H1-hESC	60079	9106	23164	0.151567	0.385559
MAX	TAF1	GABPA	HeLa-S3	47629	6518	13881	0.136849	0.29144
MAX	TAF1	GABPA	HepG2	53597	9885	21968	0.184432	0.409874
MAX	TAF1	GABPA	K562	61457	18048	26512	0.293669	0.431391
MAX	TAF1	GABPA	liver	47169	7340	26433	0.155611	0.560389
MAX	TAF1	HNF4A	HepG2	53597	14590	17802	0.272217	0.332145
MAX	TAF1	HNF4A	liver	47169	8367	33033	0.177383	0.700312
MAX	TAF1	HNF4A	HepG2	53597	14590	17802	0.272217	0.332145
MAX	TAF1	HNF4A	liver	47169	8367	33033	0.177383	0.700312
REST	TAF1	CTCF	H1-hESC	10221	1320	1927	0.129146	0.188533
REST	TAF1	CTCF	HeLa-S3	5528	407	1000	0.0736252	0.180897
REST	TAF1	CTCF	HepG2	16109	1219	2141	0.075672	0.132907
REST	TAF1	CTCF	A549	10545	643	1225	0.0609768	0.116169
REST	TAF1	CTCF	GM12878	2132	199	288	0.0933396	0.135084
REST	TAF1	CTCF	K562	10047	705	1900	0.0701702	0.189111
REST	TAF1	E2F1	HeLa-S3	5528	1388	3173	0.251085	0.573987
REST	TAF1	E2F1	GM12878	2132	638	1382	0.29925	0.648218
REST	TAF1	E2F1	K562	10047	2515	4108	0.250323	0.408878
REST	TAF1	E2F1	HeLa-S3	5528	1388	3173	0.251085	0.573987
REST	TAF1	E2F1	GM12878	2132	638	1382	0.29925	0.648218
REST	TAF1	E2F1	K562	10047	2515	4108	0.250323	0.408878
REST	TAF1	GABPA	H1-hESC	10221	3468	4536	0.339301	0.443792
REST	TAF1	GABPA	HeLa-S3	5528	1000	2992	0.180897	0.541245
REST	TAF1	GABPA	HepG2	16109	3590	7254	0.222857	0.450307
REST	TAF1	GABPA	GM12878	2132	884	1009	0.414634	0.473265
REST	TAF1	GABPA	K562	10047	1333	5185	0.132676	0.516074
REST	TAF1	GABPA	liver	61331	8408	30016	0.137092	0.48941
REST	TAF1	GABPA	H1-hESC	10221	3468	4536	0.339301	0.443792
REST	TAF1	GABPA	HeLa-S3	5528	1000	2992	0.180897	0.541245
REST	TAF1	GABPA	HepG2	16109	3590	7254	0.222857	0.450307
REST	TAF1	GABPA	GM12878	2132	884	1009	0.414634	0.473265
REST	TAF1	GABPA	K562	10047	1333	5185	0.132676	0.516074
REST	TAF1	GABPA	liver	61331	8408	30016	0.137092	0.48941
REST	TAF1	HNF4A	HepG2	16109	5854	7239	0.363399	0.449376
REST	TAF1	HNF4A	liver	61331	9034	36678	0.147299	0.598034
REST	TAF1	HNF4A	HepG2	16109	5854	7239	0.363399	0.449376
REST	TAF1	HNF4A	liver	61331	9034	36678	0.147299	0.598034
GABPA	ATF3	NANOG	H1-hESC	3877	417	499	0.107557	0.128708
GABPA	CTCF	NANOG	H1-hESC	14959	952	1151	0.0636406	0.0769436
GABPA	EGR1	NANOG	H1-hESC	9020	1109	1339	0.122949	0.148448
GABPA	GABPA	NANOG	H1-hESC	51666	2558	3261	0.0495103	0.0631169
GABPA	JUND	NANOG	H1-hESC	4840	755	913	0.155992	0.188636
GABPA	MAX	NANOG	H1-hESC	22676	1646	2036	0.0725878	0.0897866
GABPA	REST	NANOG	H1-hESC	4012	451	541	0.112413	0.134845
GABPA	TAF1	NANOG	H1-hESC	18669	1551	1947	0.0830789	0.104291

## Sheet: Table S7. BAU label counts
Supplementary table S7. Counts of labels ‘B’ (co-bound), ‘U’ (un-co-bound), and ‘A’ (ambiguous) of 56 TF-TF pairs in 10 different cell types.
	TF2	Cell	B	A	U
ATF3	CTCF	H1-hESC	7333	64271	51605132
ATF3	CTCF	HCT116	5801	66752	51604183
ATF3	CTCF	HepG2	2430	27838	51646468
ATF3	CTCF	K562	16368	158609	51501759
ATF3	CTCF	A549	8180	90004	51578552
ATF3	EGR1	H1-hESC	3925	49315	51623496
ATF3	EGR1	HCT116	38445	242213	51396078
ATF3	EGR1	K562	41538	260713	51374485
ATF3	GABPA	H1-hESC	3877	87996	51584863
ATF3	GABPA	HepG2	4721	42635	51629380
ATF3	GABPA	K562	17137	121471	51538128
ATF3	JUND	H1-hESC	4501	48349	51623886
ATF3	JUND	HCT116	51179	270771	51354786
ATF3	JUND	HepG2	4268	31365	51641103
ATF3	JUND	K562	107199	429451	51140086
ATF3	JUND	A549	22668	148088	51505980
ATF3	MAX	H1-hESC	12393	105362	51558981
ATF3	MAX	HCT116	57952	288783	51330001
ATF3	MAX	HepG2	10645	73115	51592976
ATF3	MAX	K562	62200	389034	51225502
ATF3	MAX	A549	45211	260284	51371241
ATF3	REST	H1-hESC	1571	44270	51630895
ATF3	REST	HepG2	3110	38352	51635274
ATF3	REST	K562	10899	142798	51523039
ATF3	REST	A549	5966	63575	51607195
ATF3	TAF1	H1-hESC	9799	79399	51587538
ATF3	TAF1	HepG2	4808	27315	51644613
ATF3	TAF1	K562	29408	189857	51457471
ATF3	TAF1	A549	17569	99964	51559203
CTCF	E2F1	HeLa-S3	5658	39335	51631743
CTCF	E2F1	K562	6826	90882	51579028
CTCF	E2F1	GM12878	7308	97977	51571451
CTCF	EGR1	H1-hESC	9220	74546	51592970
CTCF	EGR1	K562	14357	91161	51571218
CTCF	EGR1	MCF-7	8172	110970	51557594
CTCF	EGR1	HCT116	12019	98201	51566516
CTCF	EGR1	GM12878	7355	60689	51608692
CTCF	FOXA1	HepG2	14317	81970	51580449
CTCF	FOXA1	MCF-7	8216	67210	51601310
CTCF	GABPA	H1-hESC	14959	174854	51486923
CTCF	GABPA	HeLa-S3	3439	46681	51626616
CTCF	GABPA	HepG2	7119	74932	51594685
CTCF	GABPA	K562	8135	62109	51606492
CTCF	GABPA	MCF-7	13013	155680	51508043
CTCF	GABPA	GM12878	2458	41001	51633277
CTCF	JUND	A549	8463	64100	51604173
CTCF	JUND	H1-hESC	5177	61574	51609985
CTCF	JUND	HeLa-S3	18508	108768	51549460
CTCF	JUND	HepG2	5421	39340	51631975
CTCF	JUND	K562	31837	182737	51462162
CTCF	JUND	MCF-7	7105	110158	51559473
CTCF	JUND	HCT116	9729	97281	51569726
CTCF	JUND	GM12878	2187	29809	51644740
CTCF	MAX	A549	31268	122758	51522710
CTCF	MAX	H1-hESC	39048	184019	51453669
CTCF	MAX	HeLa-S3	26288	112849	51537599
CTCF	MAX	HepG2	31404	139706	51505626
CTCF	MAX	K562	46064	187754	51442918
CTCF	MAX	HCT116	31734	126205	51518797
CTCF	MAX	GM12878	8430	70047	51598259
CTCF	NANOG	H1-hESC	4159	92988	51579589
CTCF	NANOG	iPSC	2071	55930	51618735
CTCF	REST	A549	2995	28713	51645028
CTCF	REST	H1-hESC	6476	68107	51602153
CTCF	REST	HeLa-S3	2556	40995	51633185
CTCF	REST	HepG2	4334	42203	51630199
CTCF	REST	K562	3865	69177	51603694
CTCF	REST	MCF-7	5803	128466	51542467
CTCF	REST	GM12878	808	19025	51656903
CTCF	TAF1	A549	6183	33581	51636972
CTCF	TAF1	H1-hESC	17203	105386	51554147
CTCF	TAF1	HeLa-S3	7632	53558	51615546
CTCF	TAF1	HepG2	7244	37094	51632398
CTCF	TAF1	K562	13413	83399	51579924
CTCF	TAF1	GM12878	5859	47577	51623300
E2F1	EGR1	GM12878	18052	133790	51524894
E2F1	EGR1	K562	19017	143618	51514101
E2F1	GABPA	GM12878	12529	79784	51584423
E2F1	GABPA	HeLa-S3	8182	69157	51599397
E2F1	GABPA	K562	11743	70744	51594249
E2F1	JUND	GM12878	6887	79477	51590372
E2F1	JUND	HeLa-S3	4763	52280	51619693
E2F1	JUND	K562	16170	171866	51488700
E2F1	MAX	GM12878	30142	182191	51464403
E2F1	MAX	HeLa-S3	28133	99241	51549362
E2F1	MAX	K562	27788	191150	51457798
E2F1	REST	GM12878	1871	37160	51637705
E2F1	REST	HeLa-S3	2393	50244	51624099
E2F1	REST	K562	3621	85019	51588096
E2F1	TAF1	GM12878	28066	143213	51505457
E2F1	TAF1	HeLa-S3	19891	74875	51581970
E2F1	TAF1	K562	20903	121301	51534532
EGR1	FOXA1	MCF-7	5456	68495	51602785
EGR1	FOXA1	liver	30259	112296	51534181
EGR1	GABPA	GM12878	8679	72915	51595142
EGR1	GABPA	H1-hESC	9020	144702	51523014
EGR1	GABPA	MCF-7	18829	195635	51462272
EGR1	GABPA	K562	20094	99754	51556888
EGR1	GABPA	liver	49356	154315	51473065
EGR1	JUND	GM12878	6652	54052	51616032
EGR1	JUND	H1-hESC	8188	79542	51589006
EGR1	JUND	HCT116	63355	357353	51256028
EGR1	JUND	MCF-7	11008	157880	51507848
EGR1	JUND	K562	37584	200522	51438630
EGR1	JUND	liver	64571	183217	51428948
EGR1	MAX	GM12878	19622	113859	51543255
EGR1	MAX	H1-hESC	20889	163497	51492350
EGR1	MAX	HCT116	95831	396503	51184402
EGR1	MAX	K562	57466	245778	51373492
EGR1	MAX	liver	79086	207250	51390400
EGR1	REST	GM12878	1400	33206	51642130
EGR1	REST	H1-hESC	3805	72974	51599957
EGR1	REST	MCF-7	5721	156575	51514440
EGR1	REST	K562	9591	112835	51554310
EGR1	REST	liver	66883	186346	51423507
EGR1	TAF1	GM12878	20210	101885	51554641
EGR1	TAF1	H1-hESC	21640	134530	51520566
EGR1	TAF1	K562	35805	145377	51495554
EGR1	TAF1	liver	29907	108841	51537988
FOXA1	FOXA2	HepG2	155075	444329	51077332
FOXA1	FOXA2	liver	76313	176135	51424288
FOXA1	GABPA	HepG2	6175	81388	51589173
FOXA1	GABPA	MCF-7	12159	114118	51550459
FOXA1	GABPA	liver	25367	126256	51525113
FOXA1	HNF4A	HepG2	50831	201113	51424792
FOXA1	HNF4A	liver	70068	197434	51409234
FOXA1	JUND	HepG2	27681	128973	51520082
FOXA1	JUND	MCF-7	23726	115746	51537264
FOXA1	JUND	liver	54478	156069	51466189
FOXA1	MAX	HepG2	57315	295438	51323983
FOXA1	MAX	liver	51642	156327	51468767
FOXA1	REST	HepG2	20367	132269	51524100
FOXA1	REST	MCF-7	5825	88376	51582535
FOXA1	REST	liver	45171	155193	51476372
FOXA1	TAF1	HepG2	8763	64042	51603931
FOXA1	TAF1	liver	16137	98331	51562268
FOXA2	GABPA	HepG2	6163	84484	51586089
FOXA2	GABPA	liver	29932	139917	51506887
FOXA2	HNF4A	HepG2	48449	188813	51439474
FOXA2	HNF4A	liver	90042	244757	51341937
FOXA2	JUND	HepG2	34082	145817	51496837
FOXA2	JUND	liver	62476	175010	51439250
FOXA2	MAX	HepG2	65106	305087	51306543
FOXA2	MAX	liver	60402	181427	51434907
FOXA2	REST	HepG2	20817	127262	51528657
FOXA2	REST	liver	51354	175735	51449647
FOXA2	TAF1	HepG2	9306	68149	51599281
FOXA2	TAF1	liver	19201	108298	51549237
GABPA	HNF4A	HepG2	6185	85999	51584552
GABPA	HNF4A	liver	67930	231349	51377457
GABPA	JUND	GM12878	2751	33359	51640626
GABPA	JUND	H1-hESC	4840	120393	51551503
GABPA	JUND	HeLa-S3	6338	83484	51586914
GABPA	JUND	HepG2	3200	33315	51640221
GABPA	JUND	MCF-7	23490	238993	51414253
GABPA	JUND	K562	22615	116868	51537253
GABPA	JUND	liver	53564	189271	51433901
GABPA	MAX	GM12878	11966	77337	51587433
GABPA	MAX	H1-hESC	22676	358872	51295188
GABPA	MAX	HeLa-S3	18232	122515	51535989
GABPA	MAX	HepG2	36467	275909	51364360
GABPA	MAX	K562	32788	146885	51497063
GABPA	MAX	liver	78028	213398	51385310
GABPA	REST	GM12878	809	30509	51645418
GABPA	REST	H1-hESC	4012	125172	51547552
GABPA	REST	HeLa-S3	2331	58499	51615906
GABPA	REST	HepG2	9882	83085	51583769
GABPA	REST	MCF-7	10373	219153	51447210
GABPA	REST	K562	6952	83314	51586470
GABPA	REST	liver	76743	257641	51342352
GABPA	TAF1	GM12878	13294	63894	51599548
GABPA	TAF1	H1-hESC	18669	259939	51398128
GABPA	TAF1	HeLa-S3	14878	86856	51575002
GABPA	TAF1	HepG2	26254	139599	51510883
GABPA	TAF1	K562	25694	98859	51552183
GABPA	TAF1	liver	37571	124263	51514902
HNF4A	JUND	HepG2	15566	80098	51581072
HNF4A	JUND	liver	134600	295567	51246569
HNF4A	MAX	HepG2	46149	238400	51392187
HNF4A	MAX	liver	135951	314629	51226156
HNF4A	REST	HepG2	17119	110118	51549499
HNF4A	REST	liver	114281	299917	51262538
HNF4A	TAF1	HepG2	8851	67474	51600411
HNF4A	TAF1	liver	44405	161998	51470333
JUND	MAX	HCT116	107837	442104	51126795
JUND	MAX	HeLa-S3	57658	255424	51363654
JUND	MAX	HepG2	22243	123779	51530714
JUND	MAX	K562	71920	347082	51257734
JUND	MAX	A549	48952	199522	51428262
JUND	MAX	GM12878	8114	63469	51605153
JUND	MAX	H1-hESC	13700	145304	51517732
JUND	MAX	liver	112974	266777	51296985
JUND	REST	HeLa-S3	3994	81878	51590864
JUND	REST	HepG2	8167	63081	51605488
JUND	REST	K562	14347	145607	51516782
JUND	REST	MCF-7	9336	181431	51485969
JUND	REST	A549	5502	50515	51620719
JUND	REST	GM12878	425	14592	51661719
JUND	REST	H1-hESC	3435	64927	51608374
JUND	REST	liver	92592	234225	51349919
JUND	TAF1	HeLa-S3	17553	127849	51531334
JUND	TAF1	HepG2	4132	27670	51644934
JUND	TAF1	K562	34469	168636	51473631
JUND	TAF1	A549	15139	67620	51593977
JUND	TAF1	GM12878	7661	54804	51614271
JUND	TAF1	H1-hESC	16420	124504	51535812
JUND	TAF1	liver	33500	128690	51514546
MAX	REST	A549	14652	87944	51574140
MAX	REST	GM12878	2089	35129	51639518
MAX	REST	H1-hESC	11075	146872	51518789
MAX	REST	HeLa-S3	7528	108773	51560435
MAX	REST	HepG2	33104	182341	51461291
MAX	REST	K562	16314	168859	51491563
MAX	REST	liver	112194	262570	51301972
MAX	TAF1	A549	42720	98589	51535427
MAX	TAF1	GM12878	30028	127400	51519308
MAX	TAF1	H1-hESC	60079	296607	51320050
MAX	TAF1	HeLa-S3	47629	170731	51458376
MAX	TAF1	HepG2	53597	152202	51470937
MAX	TAF1	K562	61457	209965	51405314
MAX	TAF1	liver	47169	143374	51486193
REST	TAF1	H1-hESC	10221	123516	51542999
REST	TAF1	HeLa-S3	5528	78067	51593141
REST	TAF1	HepG2	16109	71781	51588846
REST	TAF1	A549	10545	43988	51622203
REST	TAF1	GM12878	2132	29874	51644730
REST	TAF1	K562	10047	111006	51555683
REST	TAF1	liver	61331	154920	51460485

## Sheet: Table S8. p-values
Supplementary table S8. P-values of statistically significant cooperative TF-TF pairs from paired Wilcoxon test.
	p-value
ATF3_CTCF	6.73536e-84
ATF3_EGR1	3.05659e-51
ATF3_GABPA	3.05644e-51
ATF3_JUND	6.34224e-84
ATF3_MAX	6.34184e-84
ATF3_REST	1.37011e-67
ATF3_TAF1	1.37006e-67
CTCF_E2F1	3.05701e-51
CTCF_EGR1	6.34255e-84
CTCF_FOXA1	7.23501e-35
CTCF_GABPA	2.99656e-100
CTCF_JUND	6.95125e-133
CTCF_MAX	1.43585e-116
CTCF_NANOG	7.23501e-35
CTCF_REST	1.43584e-116
CTCF_TAF1	2.99641e-100
E2F1_EGR1	7.23277e-35
E2F1_GABPA	3.05594e-51
E2F1_JUND	3.05678e-51
E2F1_MAX	3.0569e-51
E2F1_REST	3.05655e-51
E2F1_TAF1	3.05598e-51
EGR1_FOXA1	7.2347e-35
EGR1_GABPA	6.34231e-84
EGR1_JUND	2.99638e-100
EGR1_MAX	6.34225e-84
EGR1_REST	6.34235e-84
EGR1_TAF1	1.3699e-67
FOXA1_FOXA2	7.23419e-35
FOXA1_GABPA	3.05686e-51
FOXA1_HNF4A	7.2344e-35
FOXA1_JUND	3.05697e-51
FOXA1_MAX	7.23399e-35
FOXA1_REST	3.05688e-51
FOXA1_TAF1	7.2346e-35
FOXA2_GABPA	7.23409e-35
FOXA2_HNF4A	7.23491e-35
FOXA2_JUND	7.2345e-35
FOXA2_MAX	7.23501e-35
FOXA2_REST	7.2345e-35
FOXA2_TAF1	7.2343e-35
GABPA_HNF4A	7.23501e-35
GABPA_JUND	1.43574e-116
GABPA_MAX	2.99646e-100
GABPA_REST	1.43579e-116
GABPA_TAF1	2.99607e-100
HNF4A_JUND	7.2348e-35
HNF4A_MAX	7.2343e-35
HNF4A_REST	7.2344e-35
HNF4A_TAF1	7.23348e-35
JUND_MAX	6.95097e-133
JUND_REST	7.35379e-133
JUND_TAF1	1.43576e-116
MAX_REST	1.43583e-116
MAX_TAF1	1.43578e-116
REST_TAF1	1.4358e-116
